# Supplementary material
Source: PubMed Central journal article supplement (PMC7586336)
Supplement: jm0c00856_si_001.pdf [file jm0c00856_si_001.pdf]

# Directing Drugs to Bugs: Antibiotic-Carbohydrate Conjugates targeting Biofilm-associated Lectins of *Pseudomonas aeruginosa*

Joscha Meiers<sup>1-3</sup>, Eva Zahorska<sup>1-3</sup>, Teresa Röhrig<sup>4</sup>, Dirk Hauck<sup>1,2</sup>, Stefanie Wagner<sup>1,2</sup>, Alexander Titz<sup>1-3</sup>

<sup>1</sup> Chemical Biology of Carbohydrates (CBCH), Helmholtz Institute for Pharmaceutical Research Saarland (HIPS), Helmholtz Centre for Infection Research, D-66123 Saarbrücken, Germany

<sup>2</sup> Deutsches Zentrum für Infektionsforschung (DZIF), Standort Hannover-Braunschweig, D-38124 Braunschweig, Germany

<sup>3</sup> Department of Pharmacy and Department of Chemistry, Saarland University, D-66123 Saarbrücken, Germany

<sup>4</sup> Drug Design and Optimization (DDOP), Helmholtz Institute for Pharmaceutical Research Saarland (HIPS), Helmholtz Centre for Infection Research, D-66123 Saarbrücken, Germany

## Table of contents

|                                                                                                                                                                   |           |
|-------------------------------------------------------------------------------------------------------------------------------------------------------------------|-----------|
| <sup>1</sup> H and <sup>13</sup> C-NMR spectra of new compounds                                                                                                   | S2 - S24  |
| Gyrase supercoiling inhibition assay gels (Figure S1)                                                                                                             | S25       |
| <i>P. aeruginosa</i> PAO1 Biofilm accumulation raw data (Figure S2)                                                                                               | S26 - S27 |
| Lectin inhibition, calculated as $K_i$ [ $\mu$ M] from $IC_{50}$ (Table S1)                                                                                       | S27       |
| Antibiotic susceptibility assay data in molar concentration (Table S2)                                                                                            | S28       |
| Key compounds and intermediates as SMILES (Table S3)                                                                                                              | S29       |
| Purity of key compounds by HPLC-UV (Figure S3)                                                                                                                    | S30 - S31 |
| Retention times and a representative chromatogram of conjugates and ciprofloxacin from slow gradient HPLC runs for lipophilicity comparison (Table S4, Figure S4) | S32 - S34 |
| SI References                                                                                                                                                     | S34       |

JOM-047\_seccol\_118-30.10.1.1r

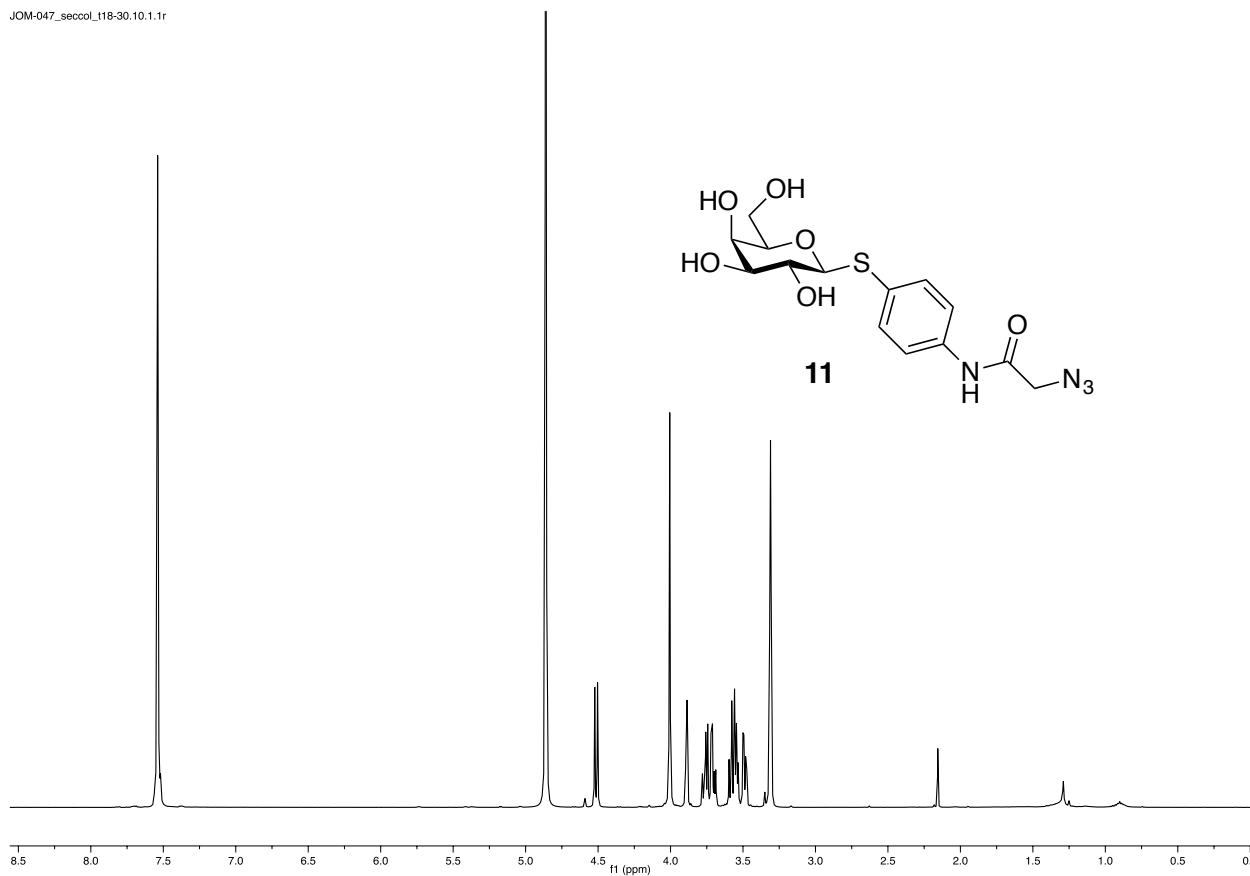

JOM-047\_crude.23.1.1r

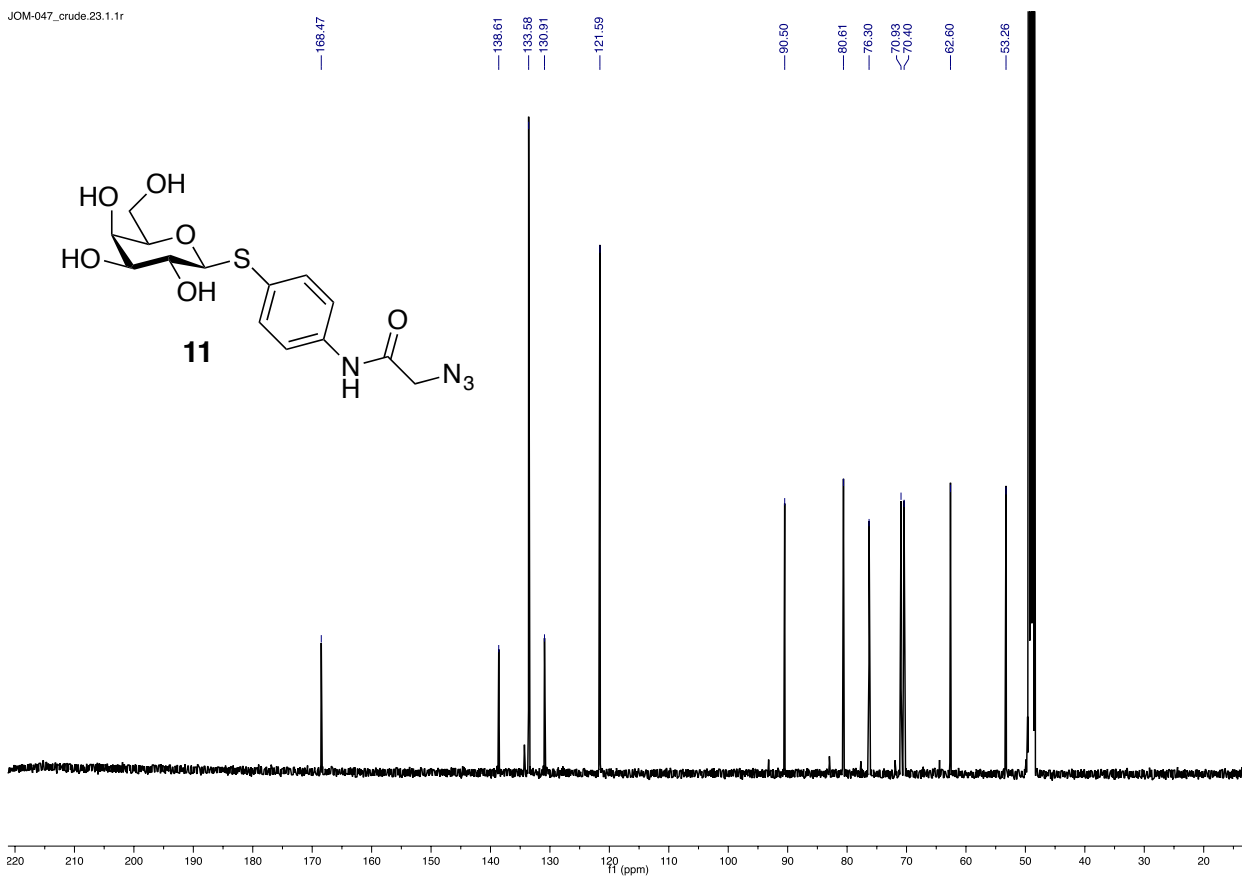

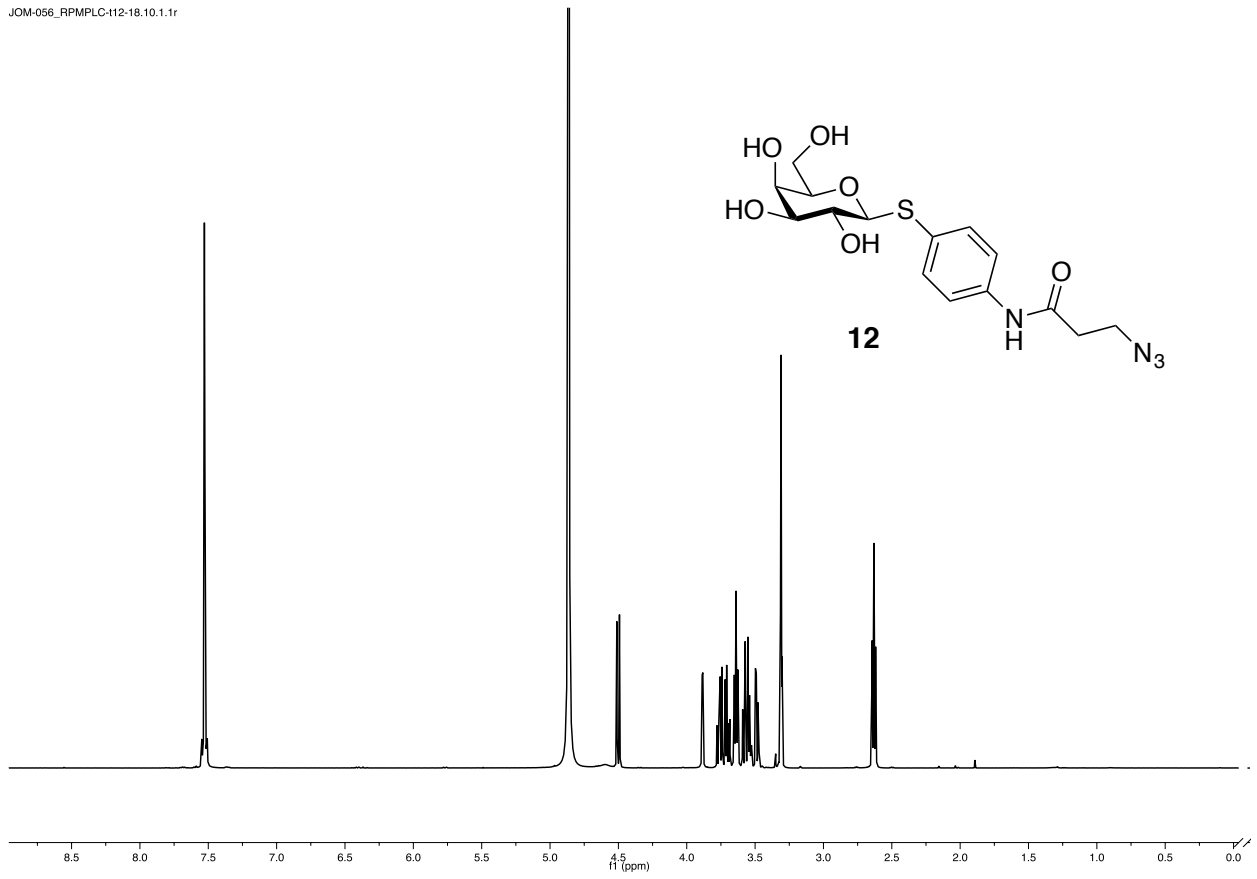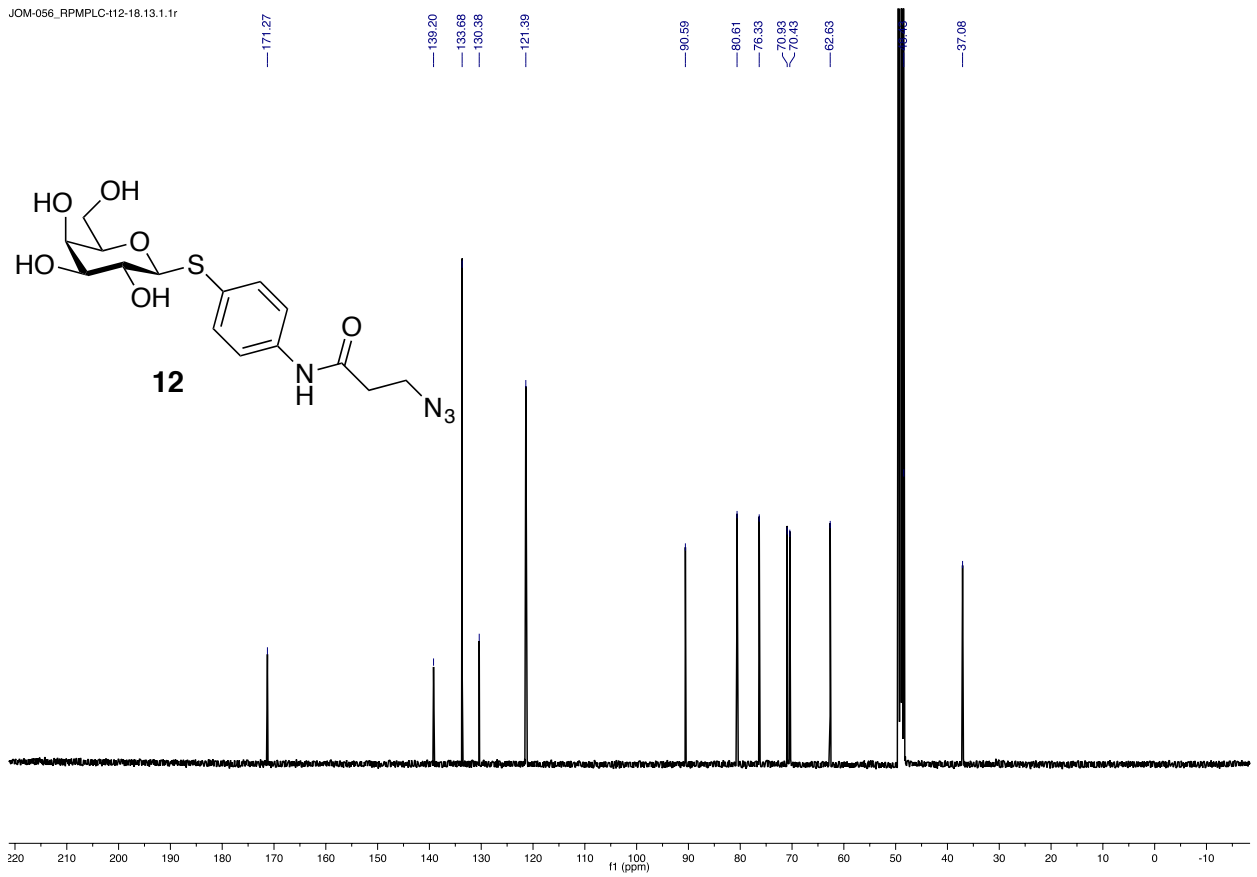

JOM-061\_RPMPLC-17-14.10.1.1f

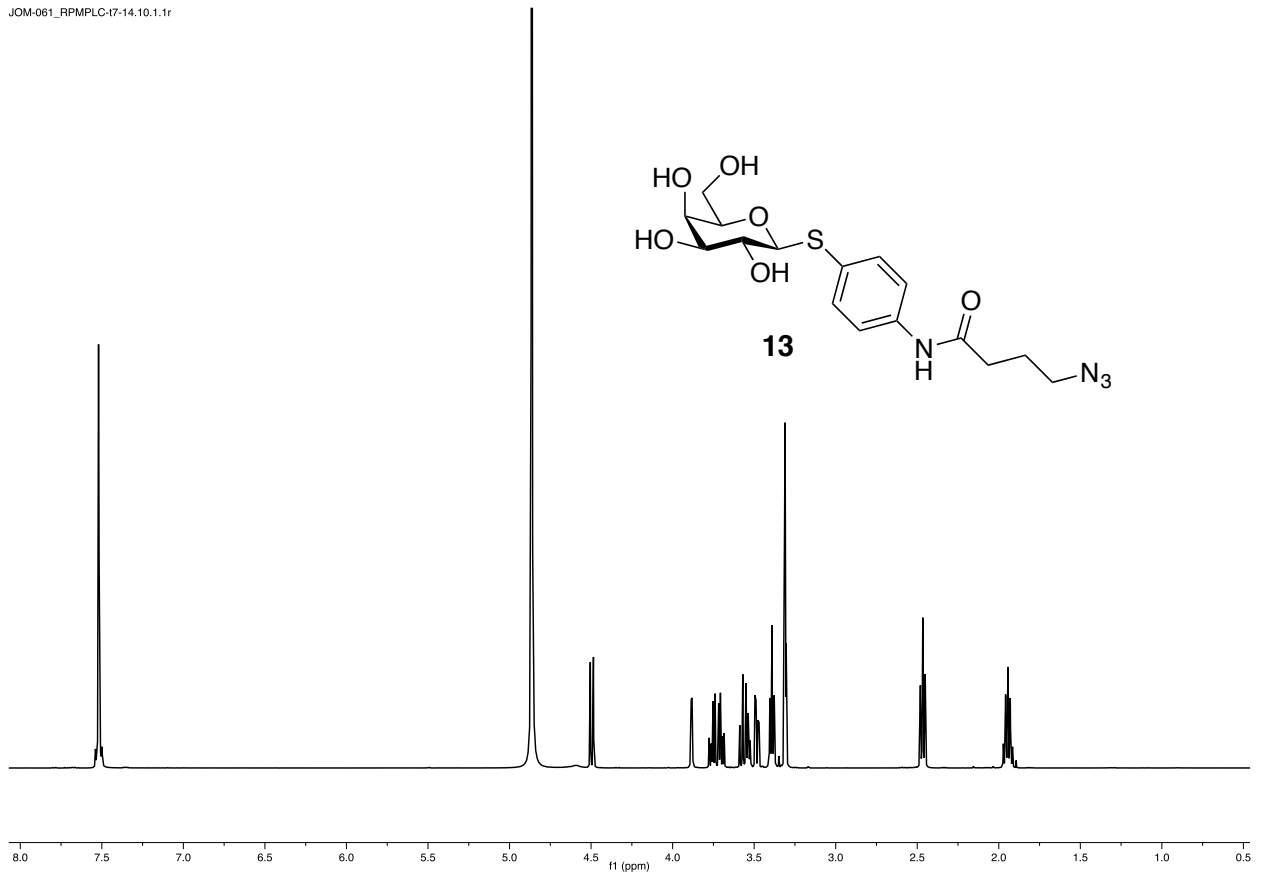

JOM-061\_RPMPLC-17-14.12.1.1f

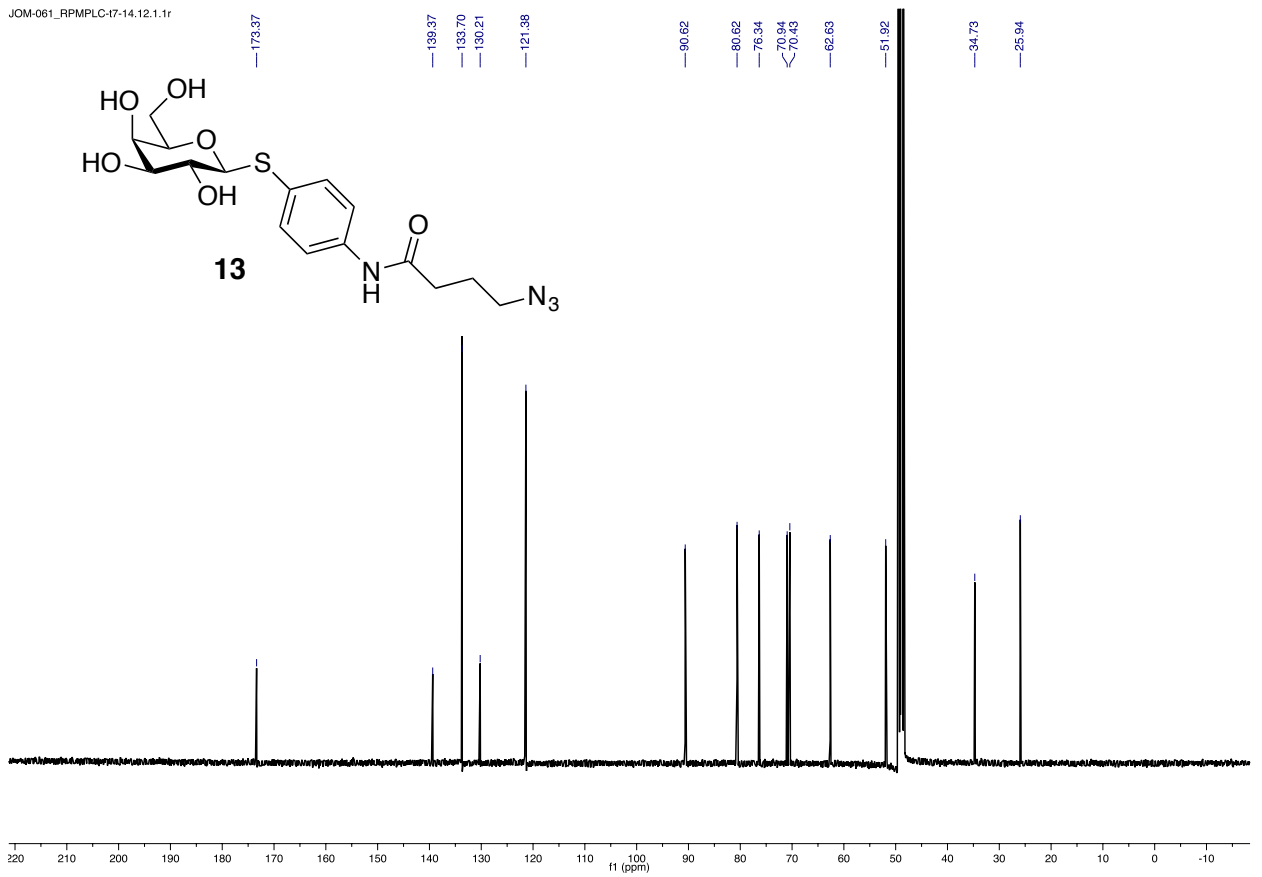

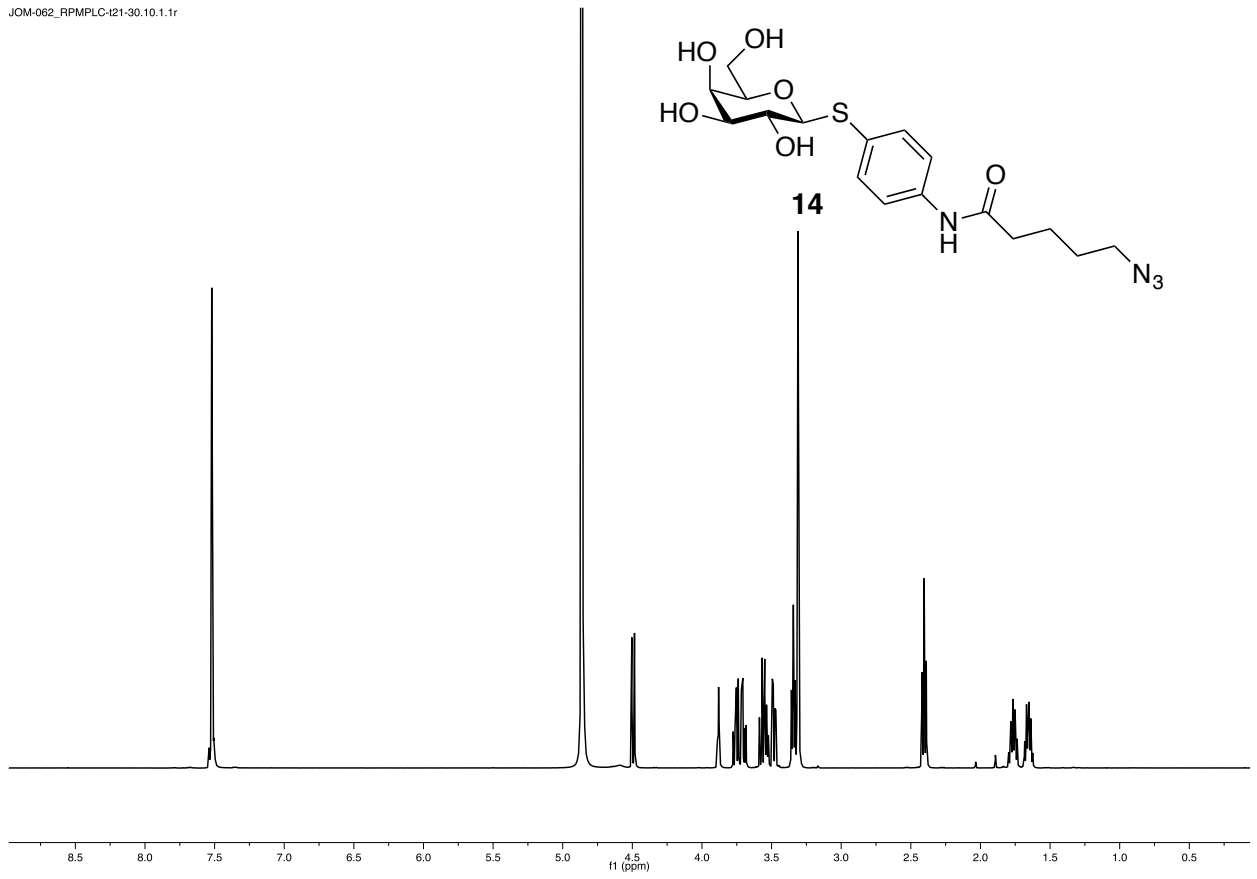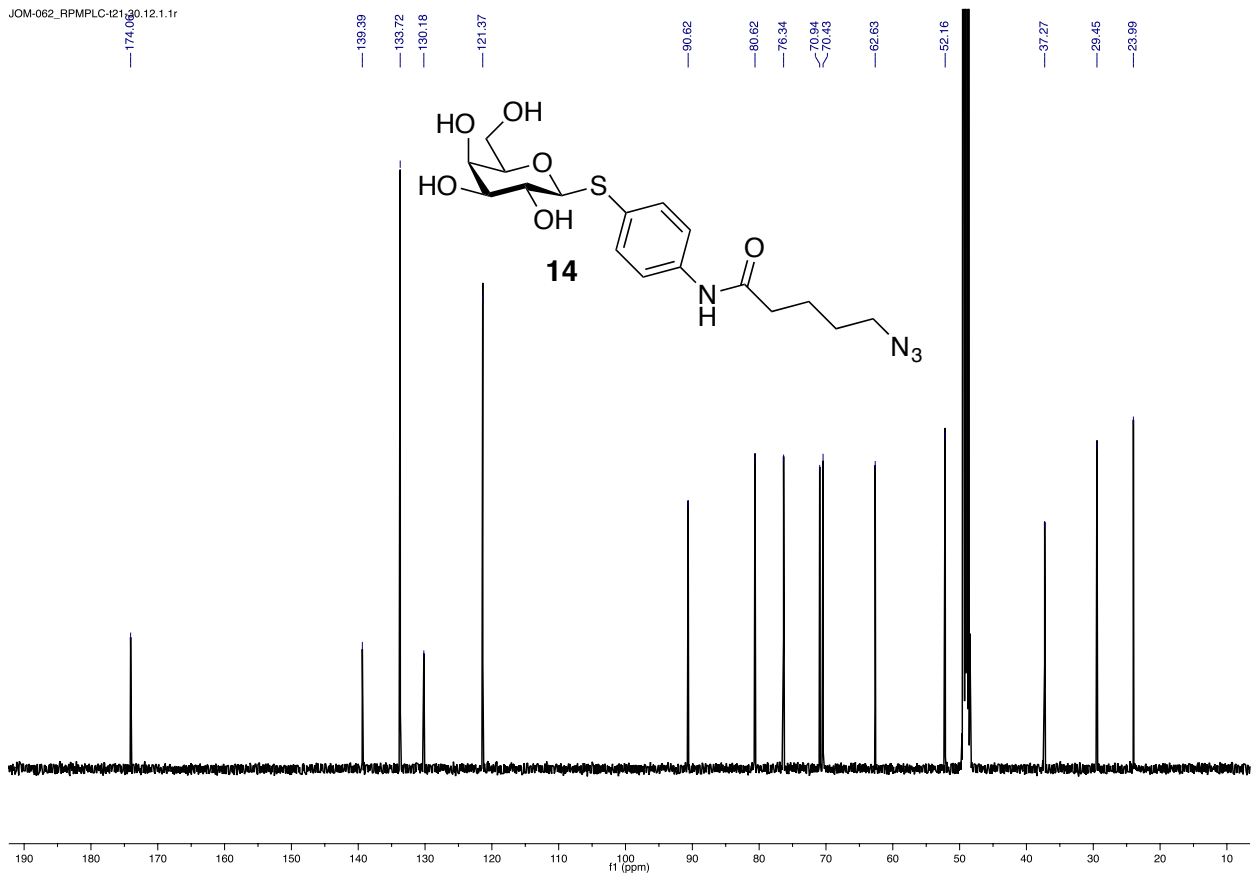

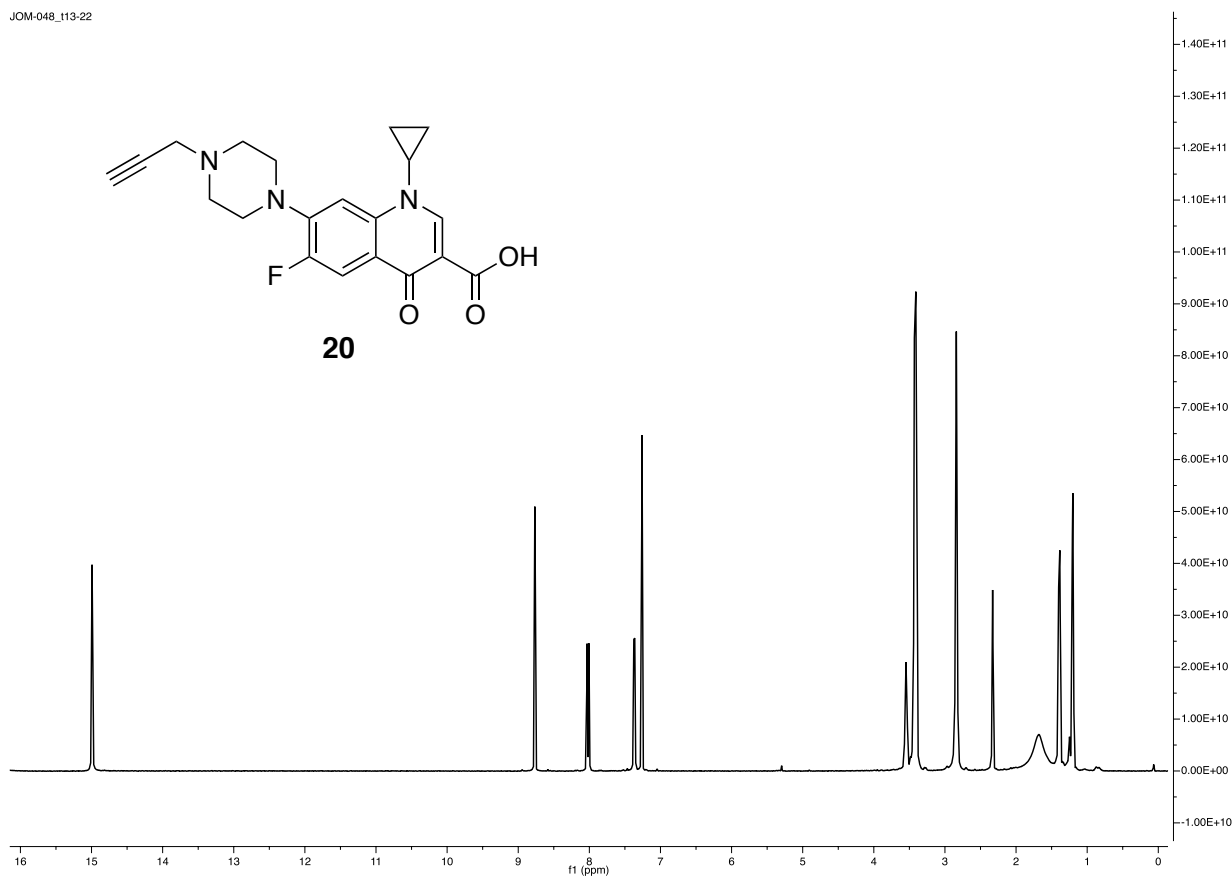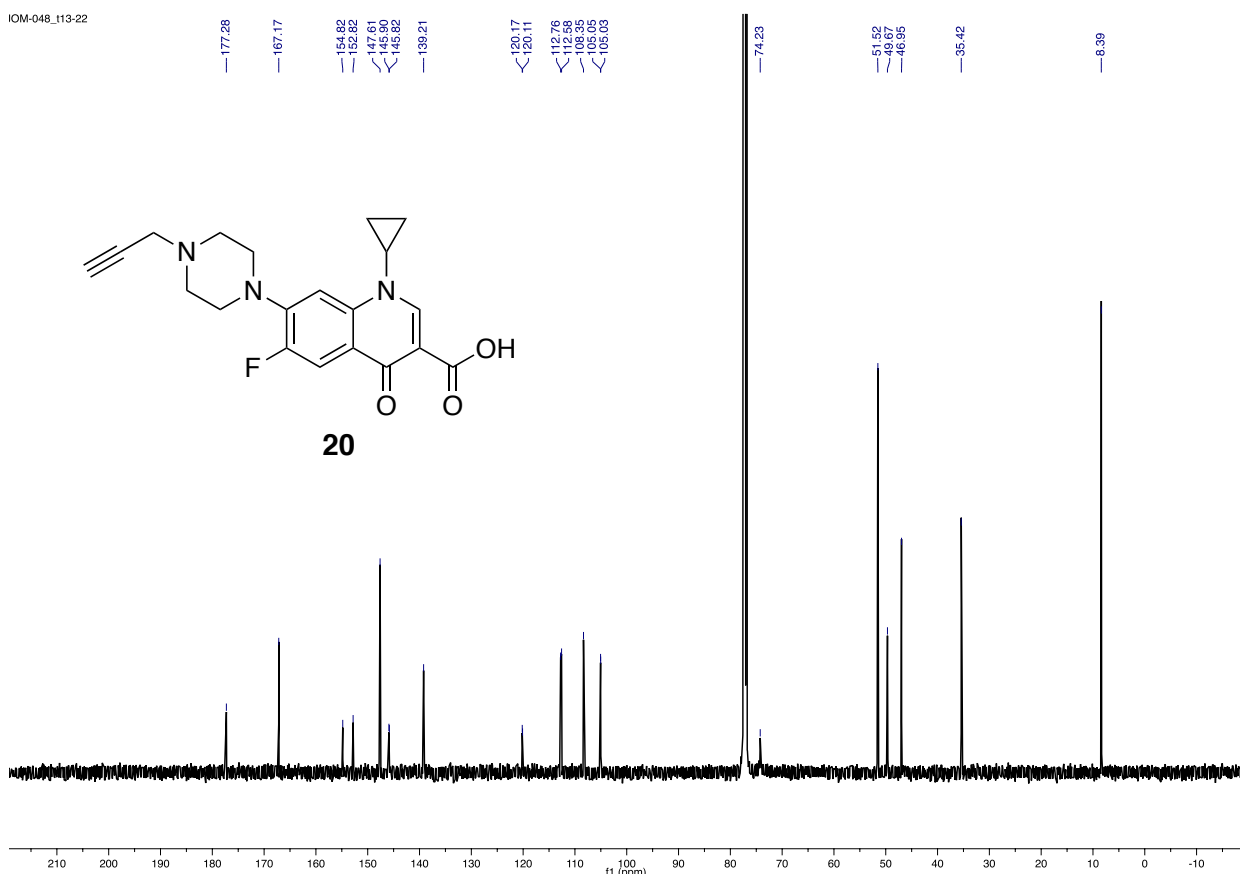

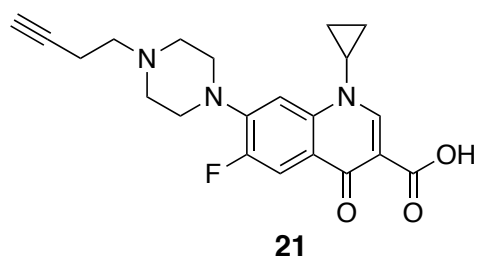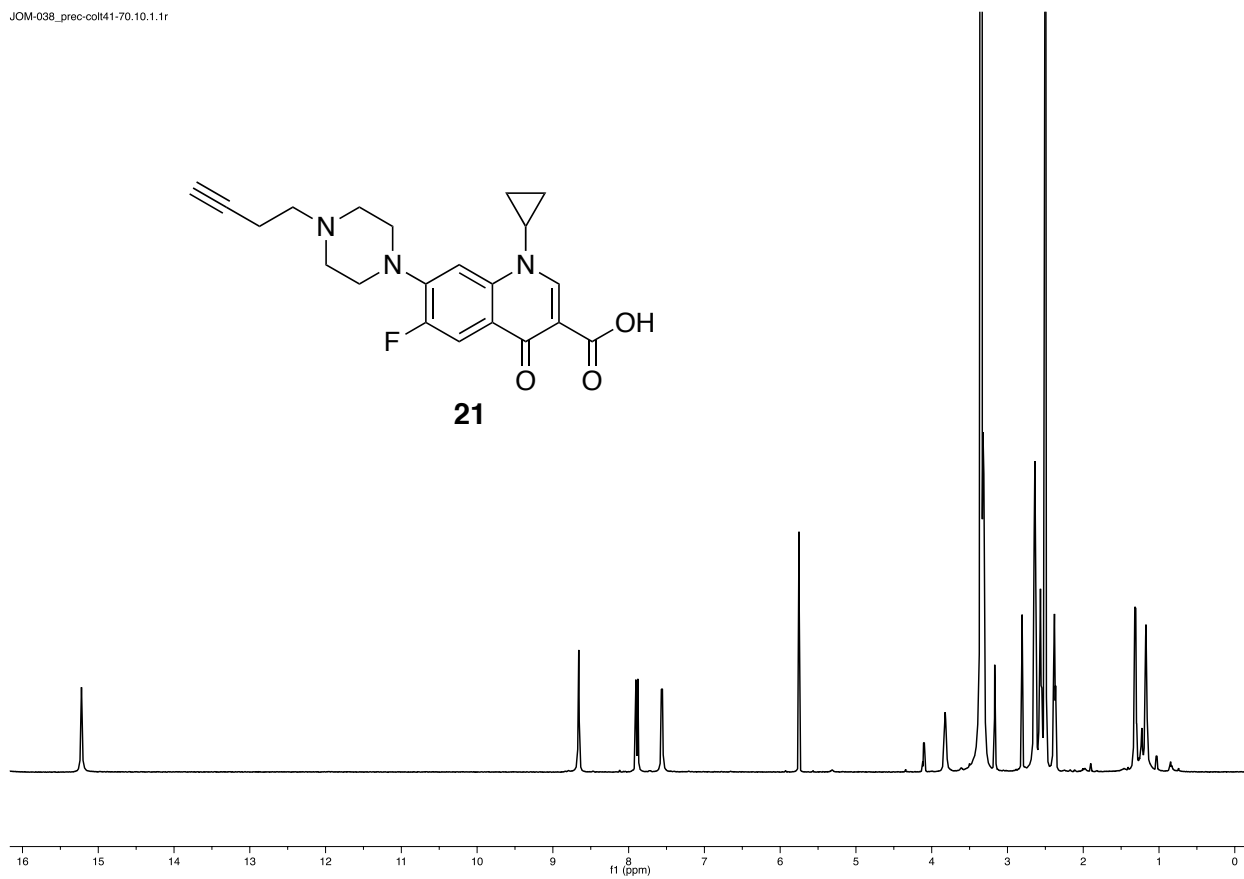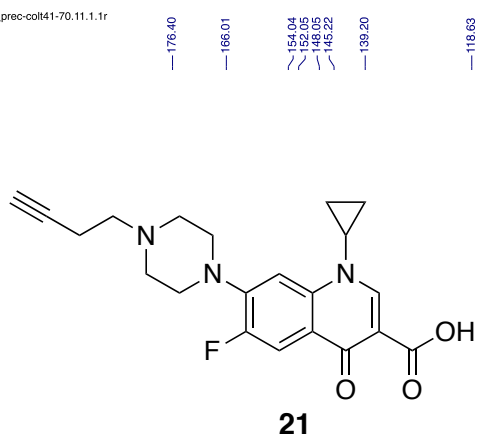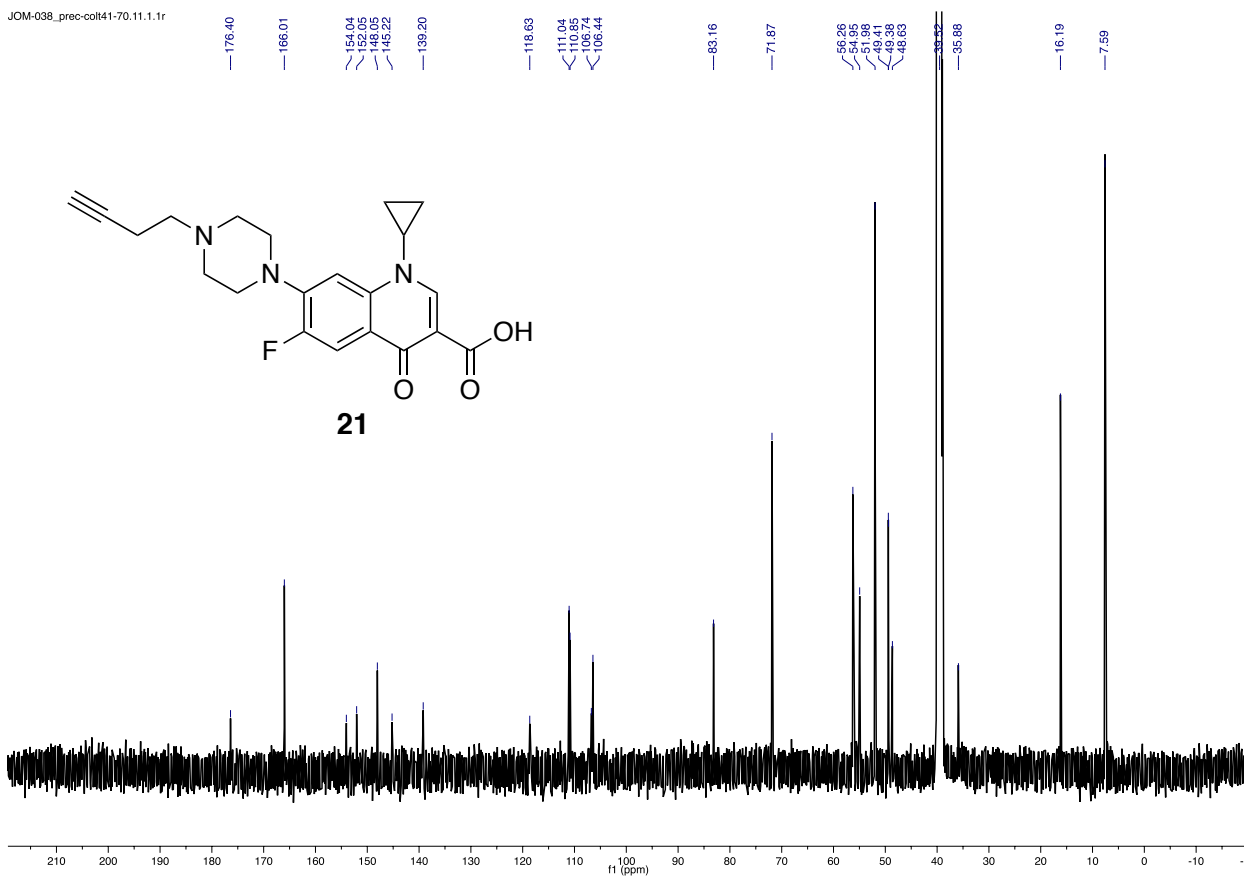

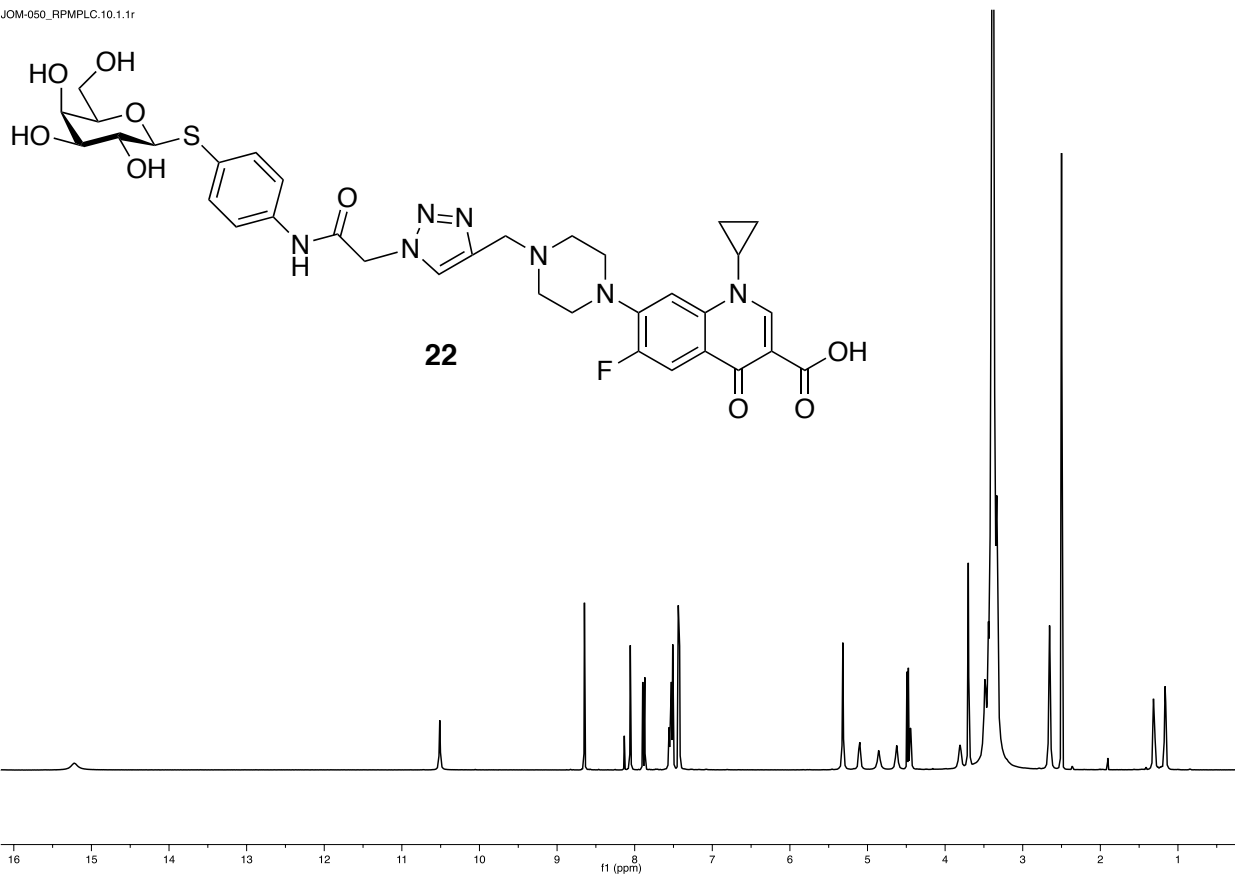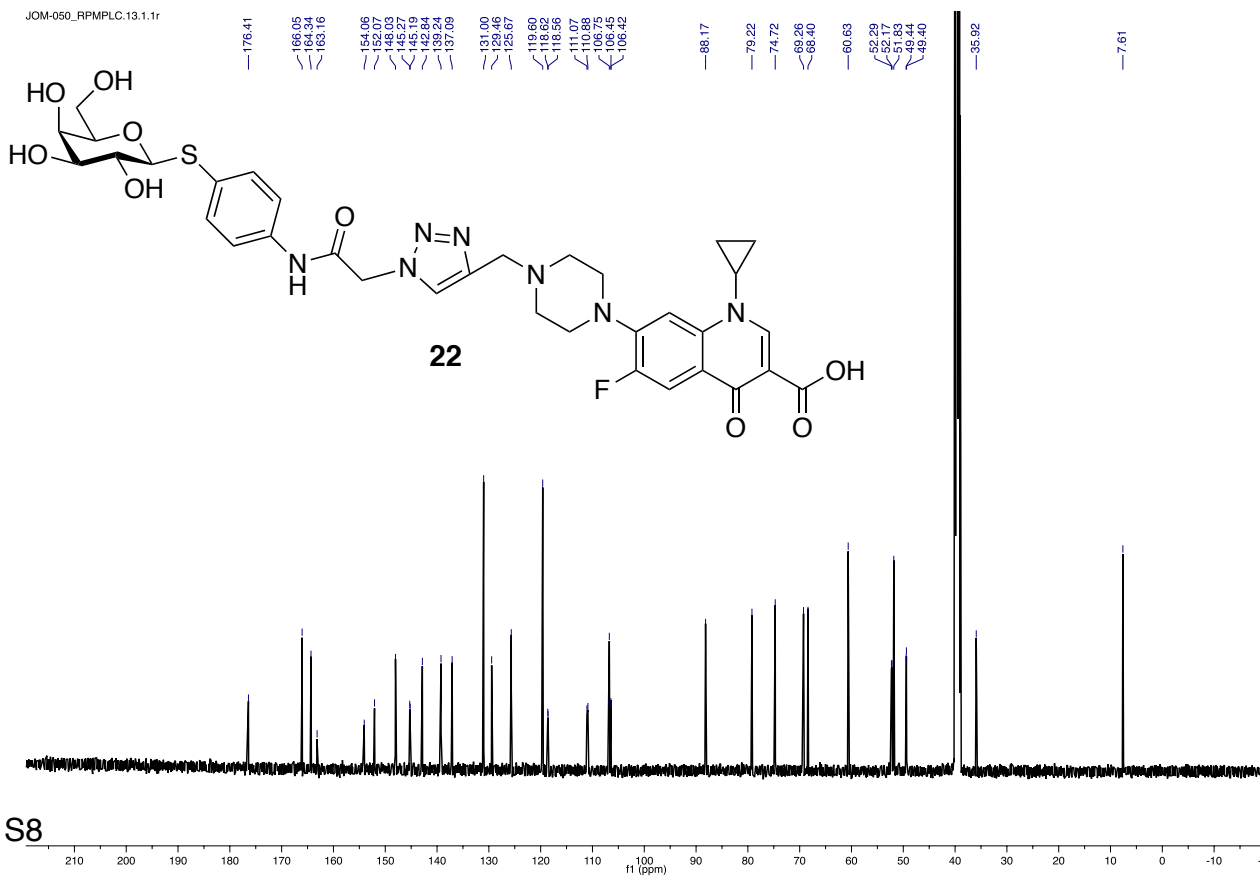



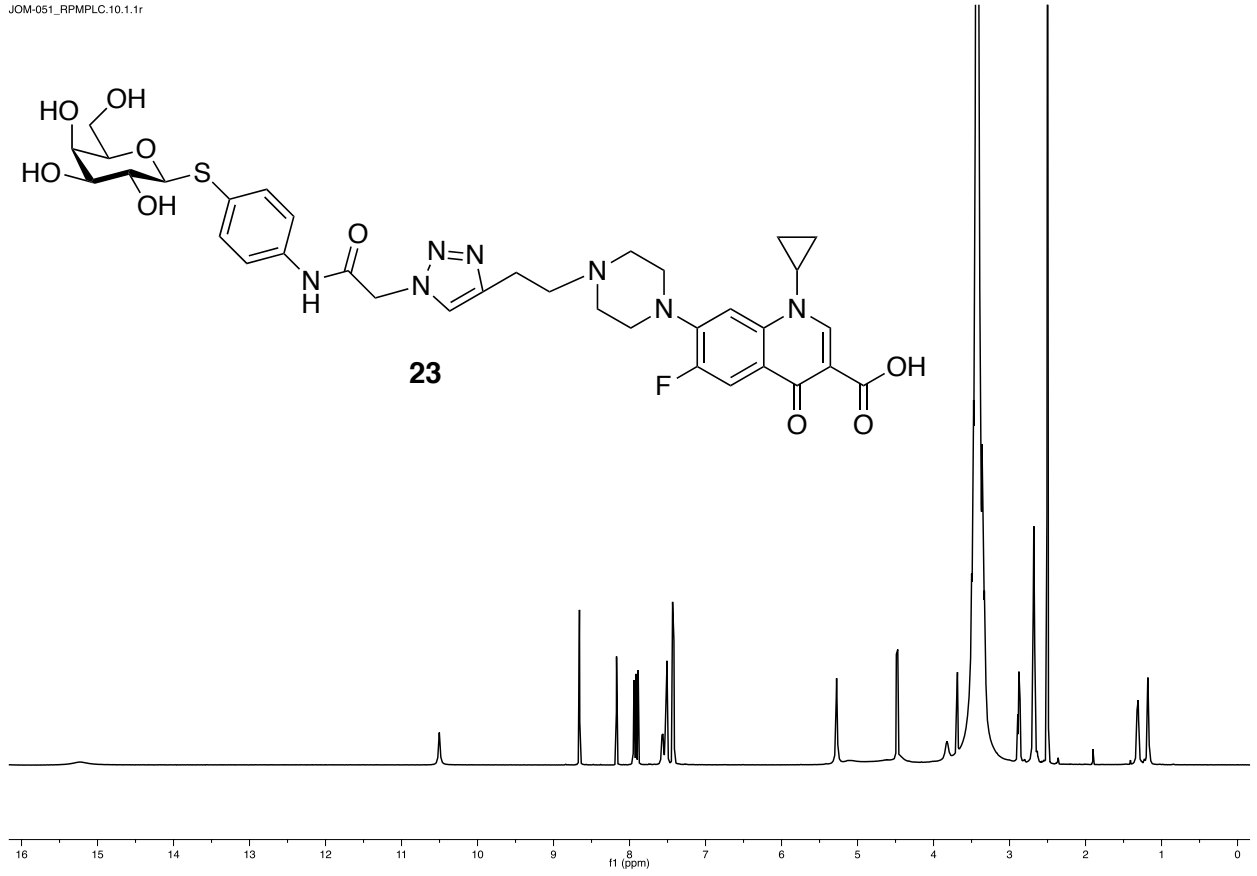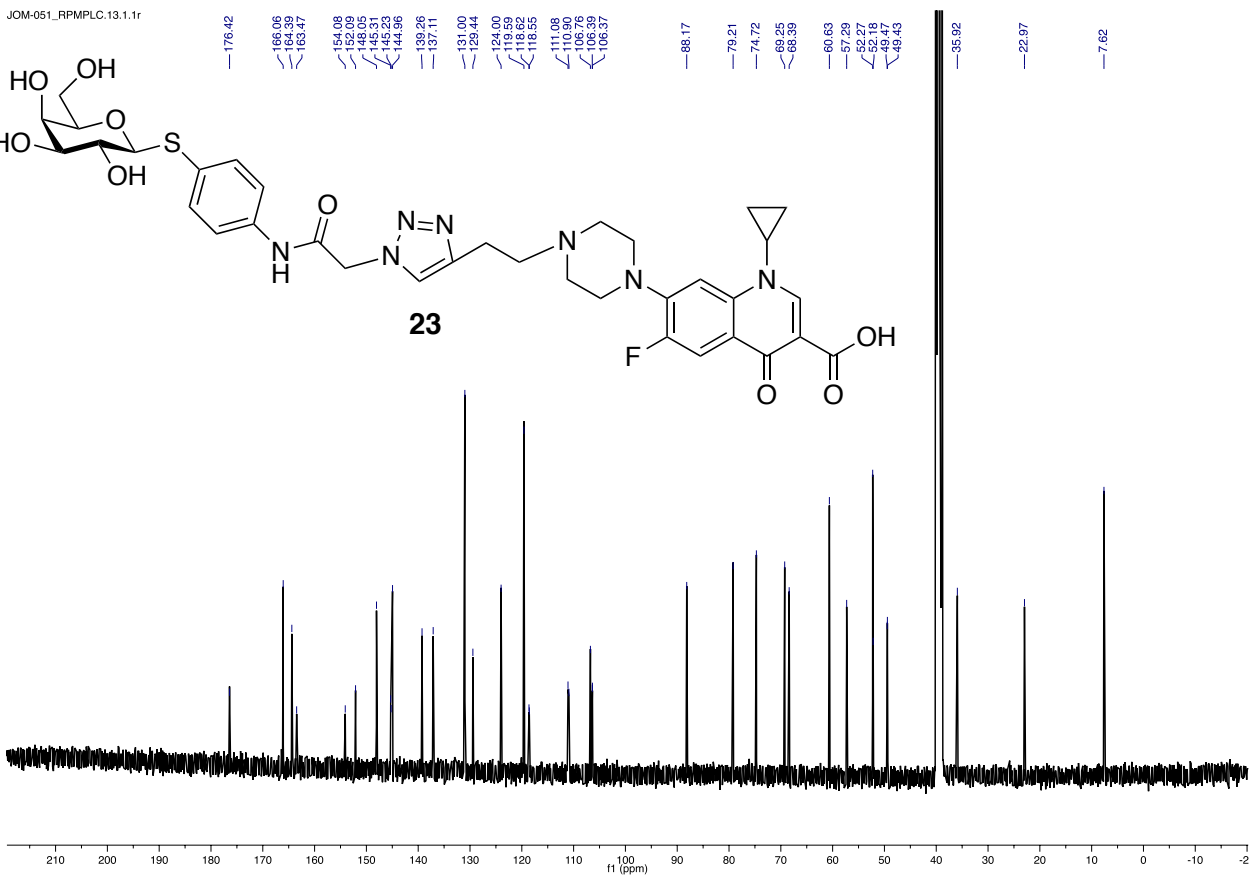

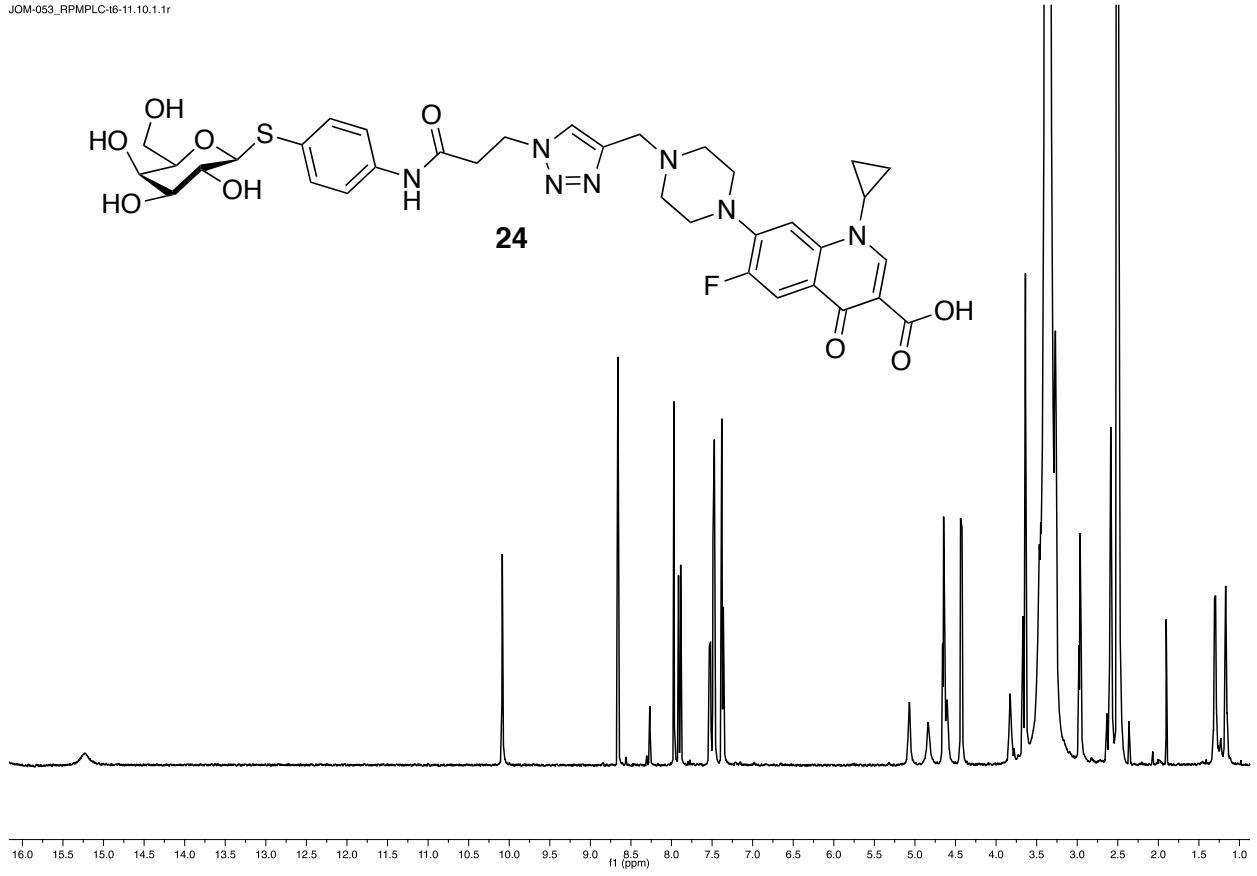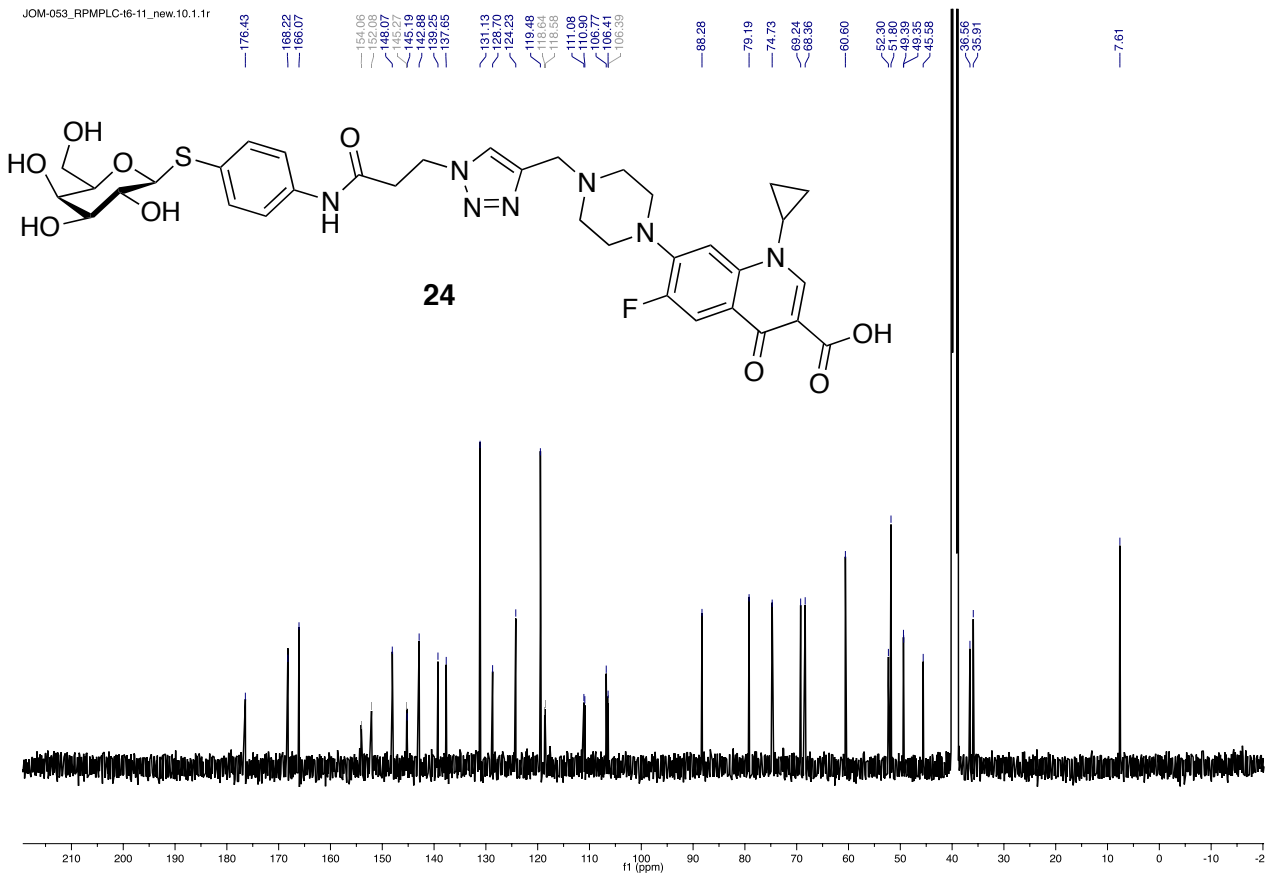

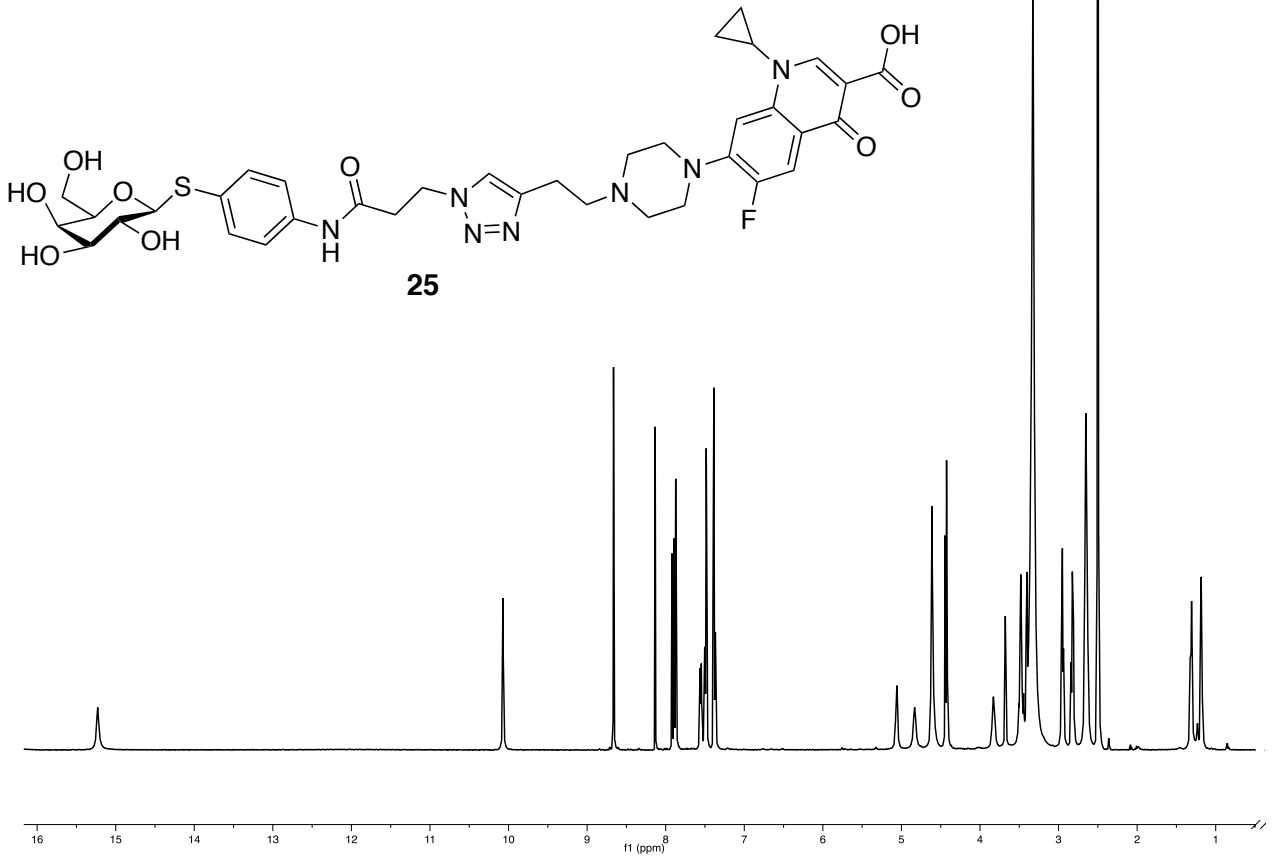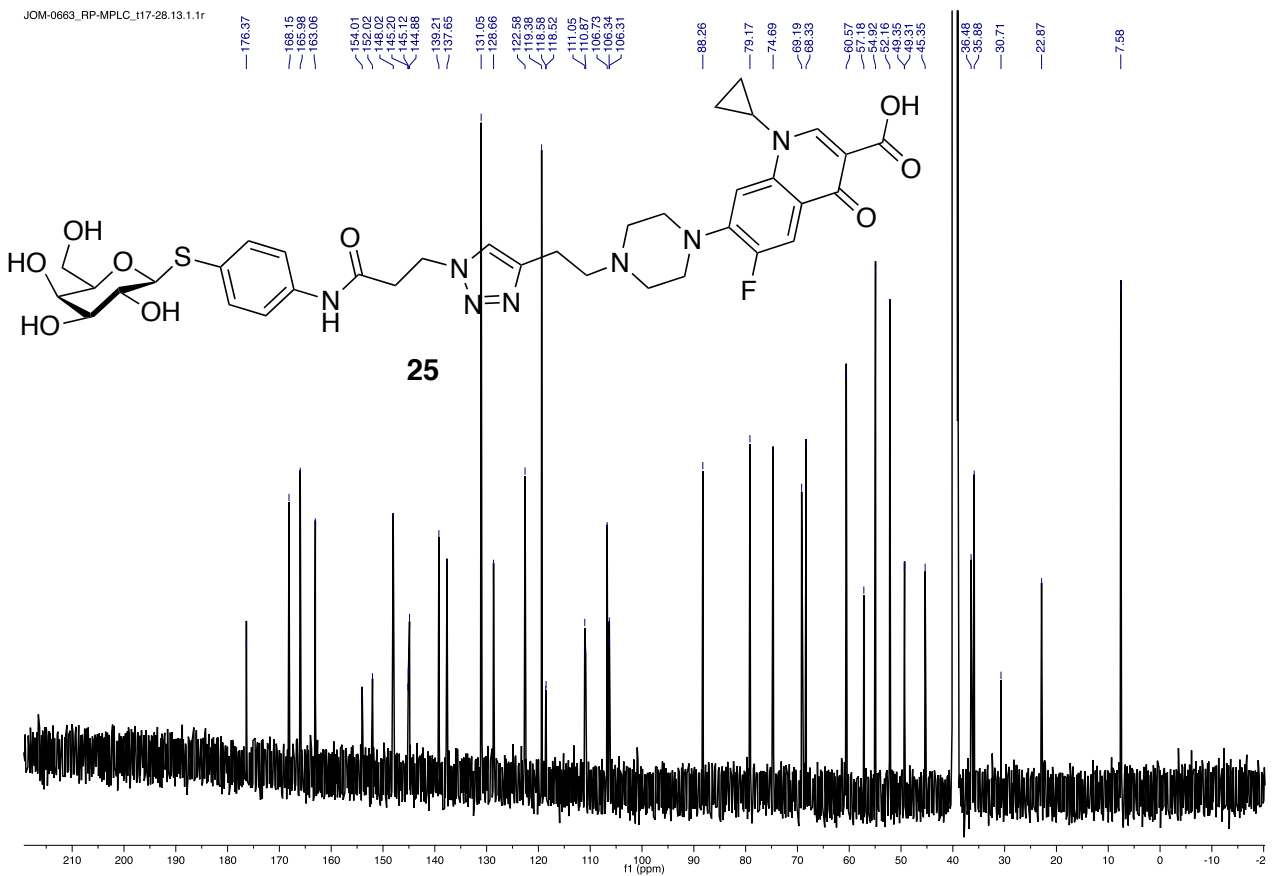

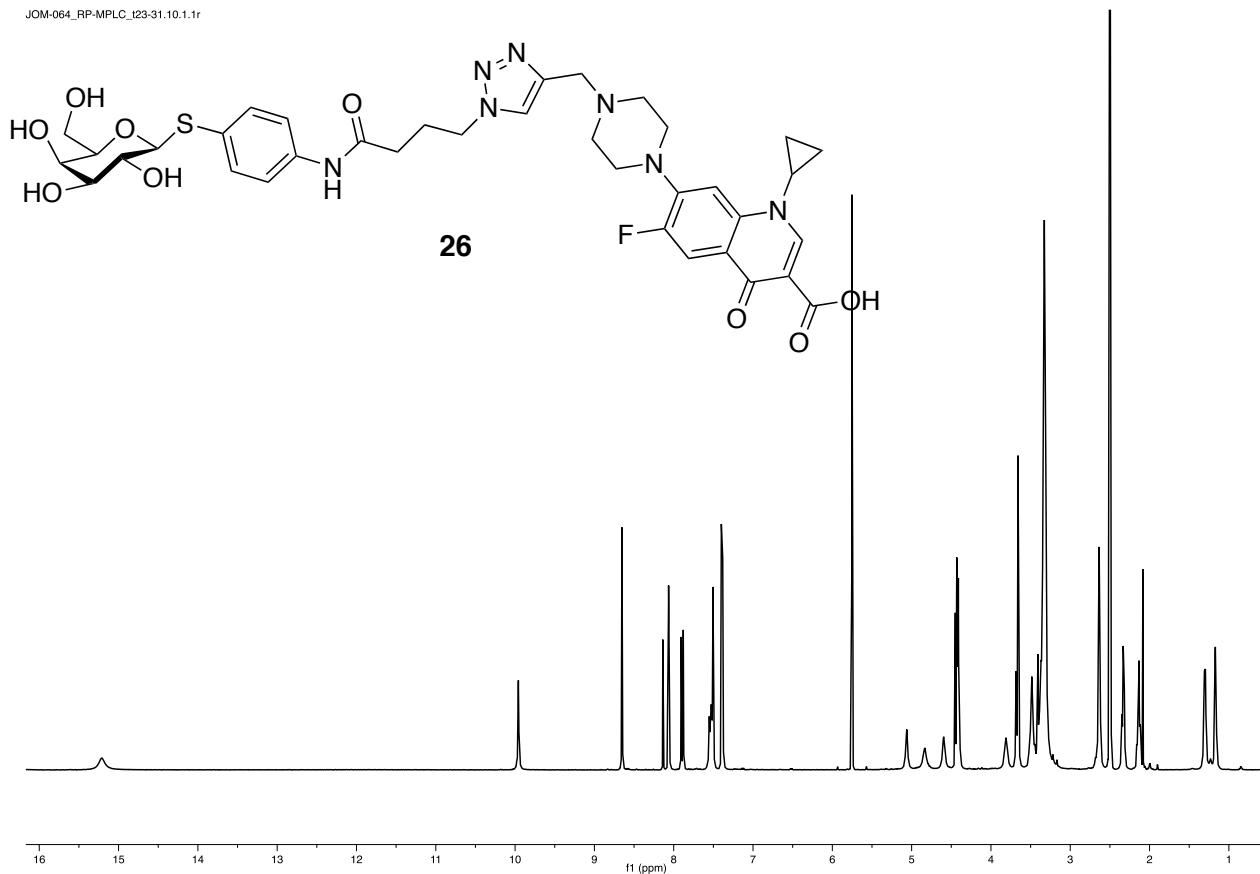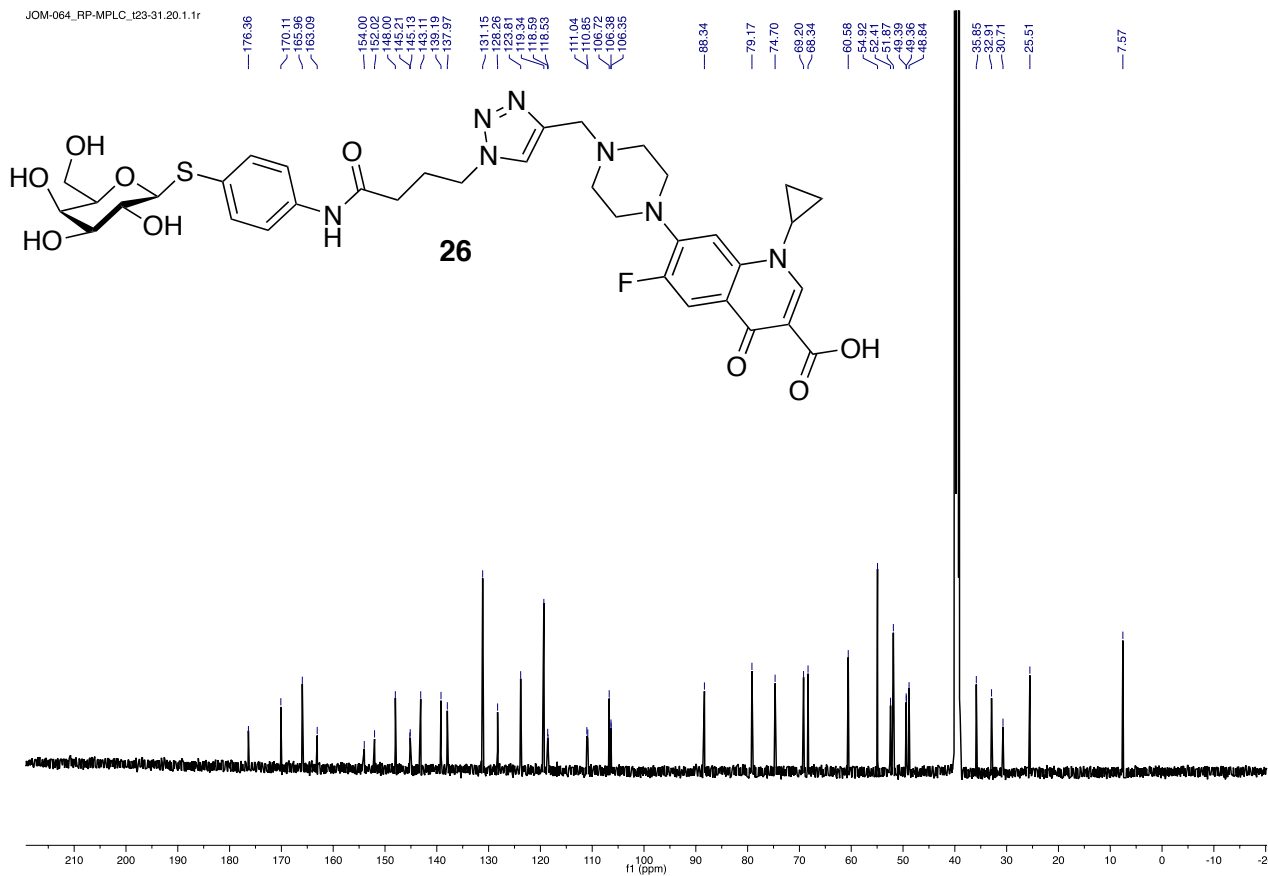

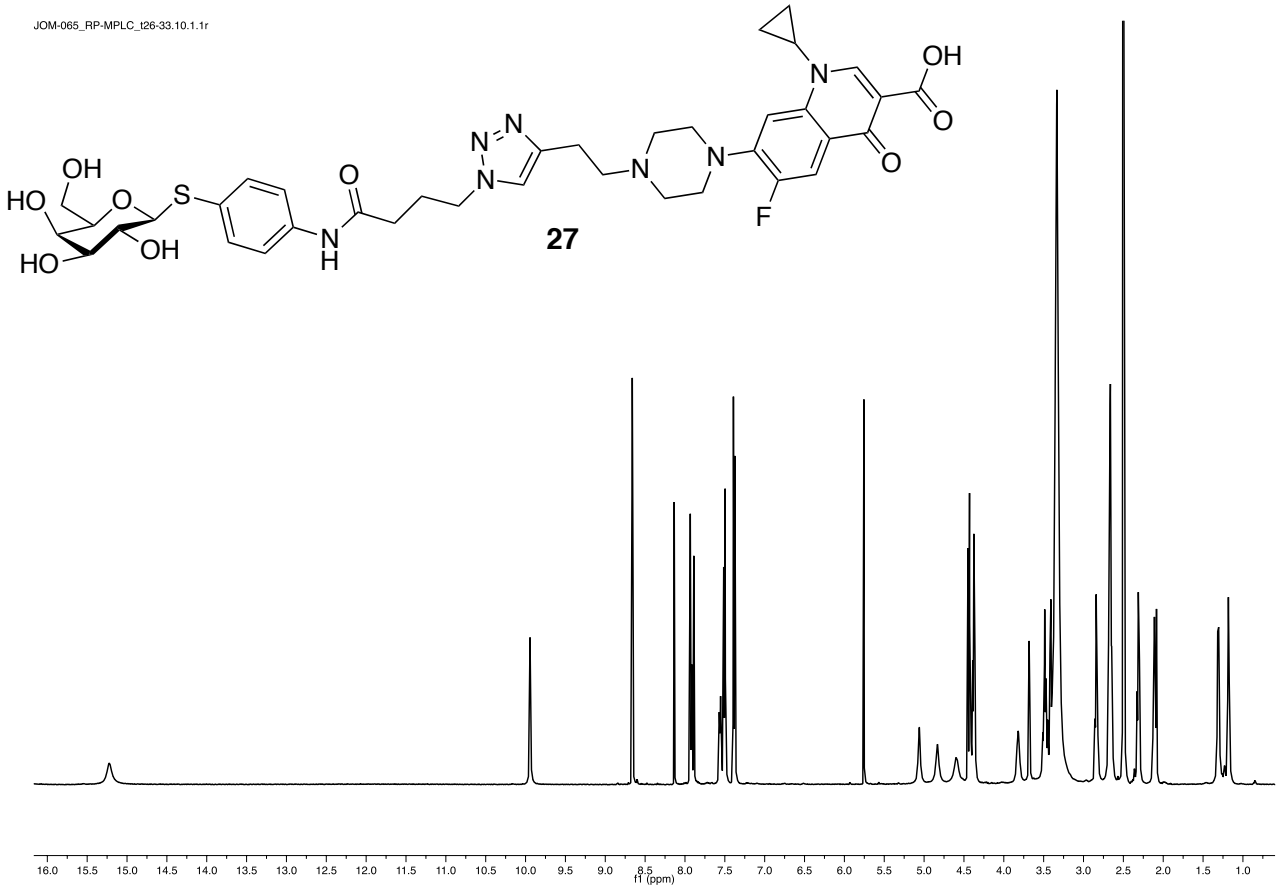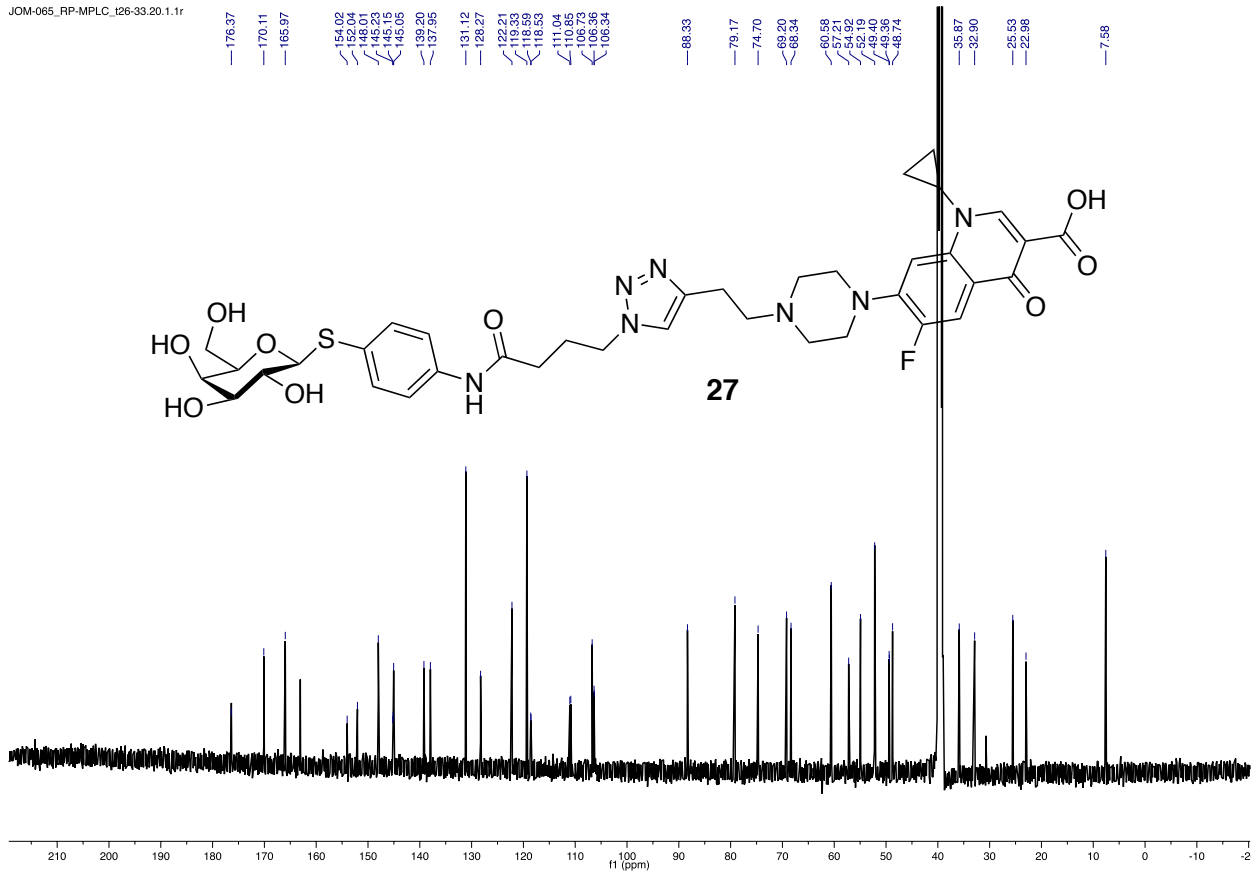

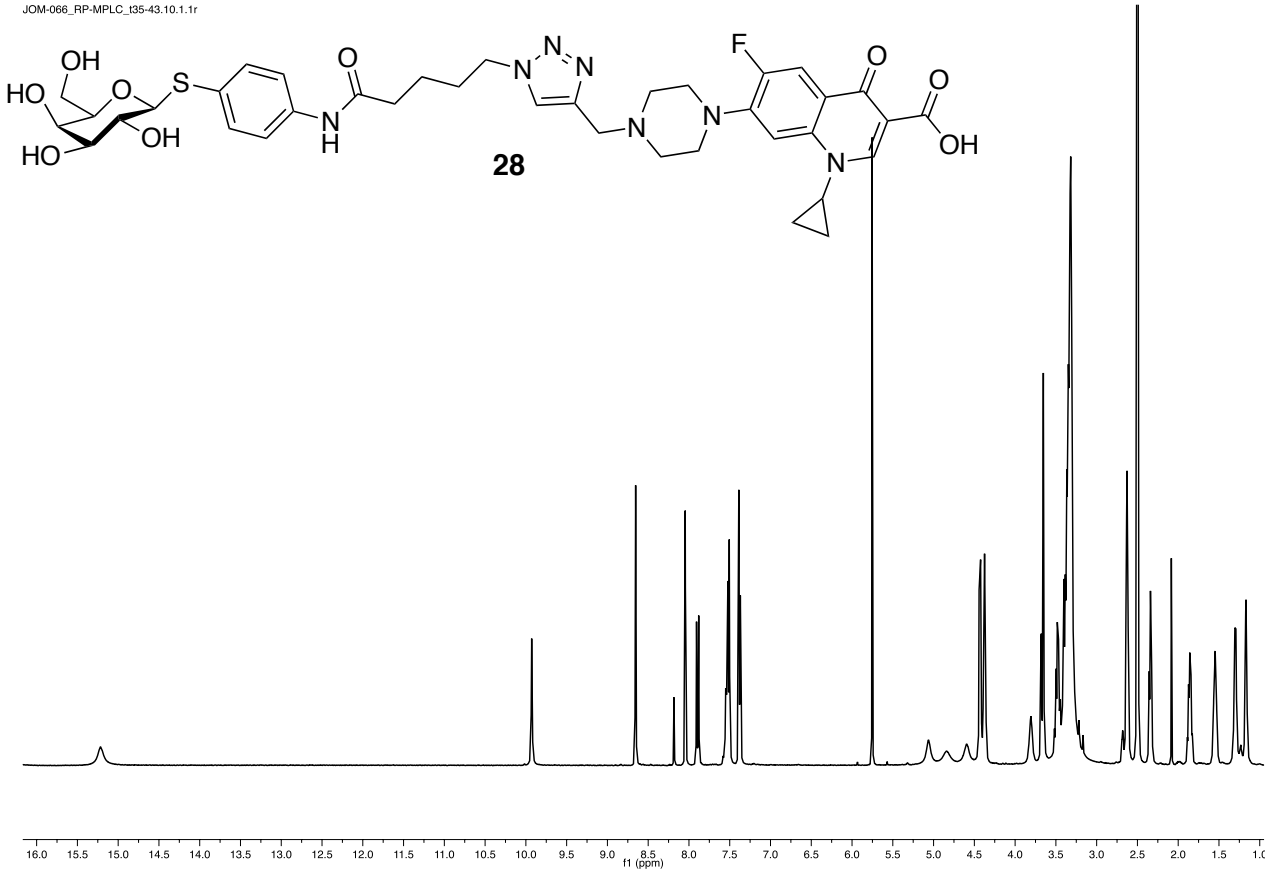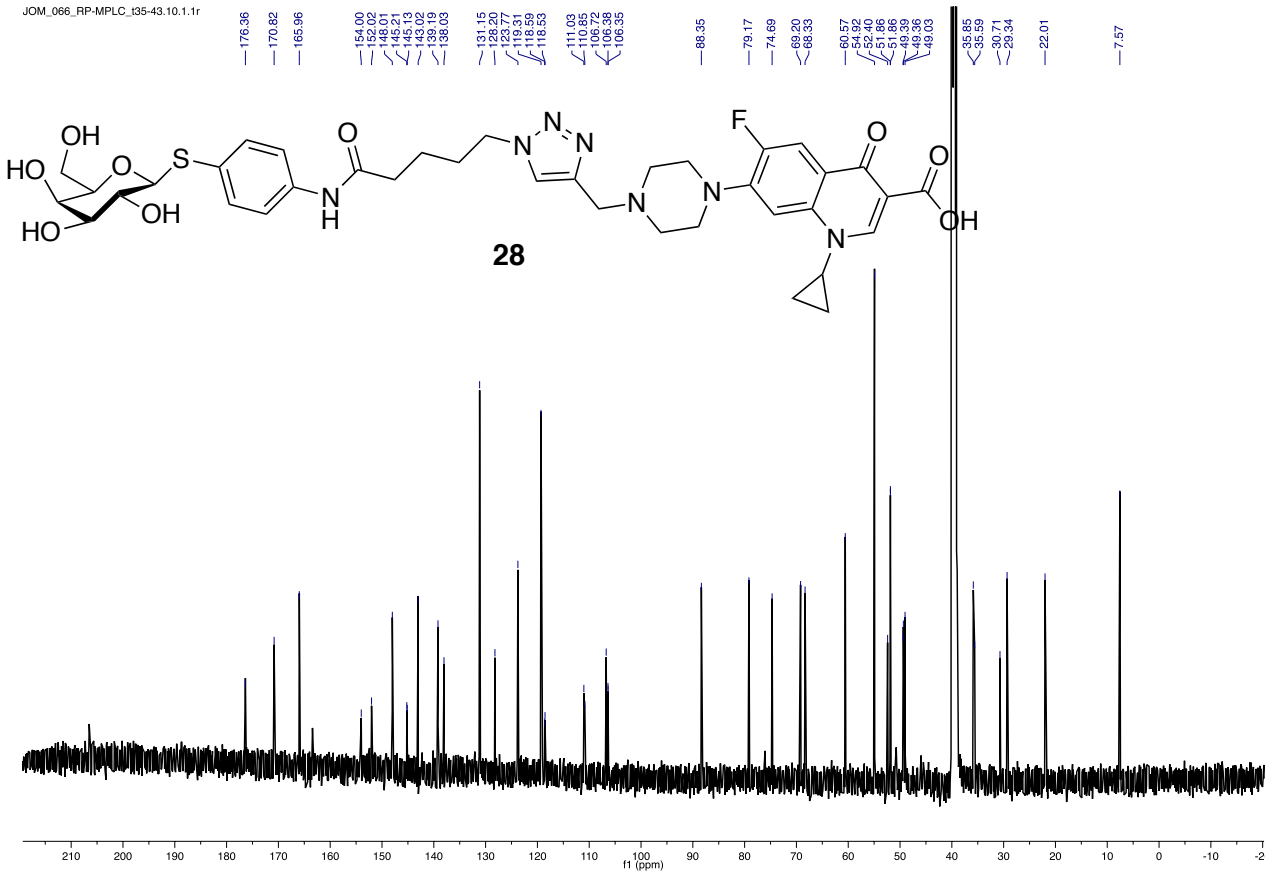

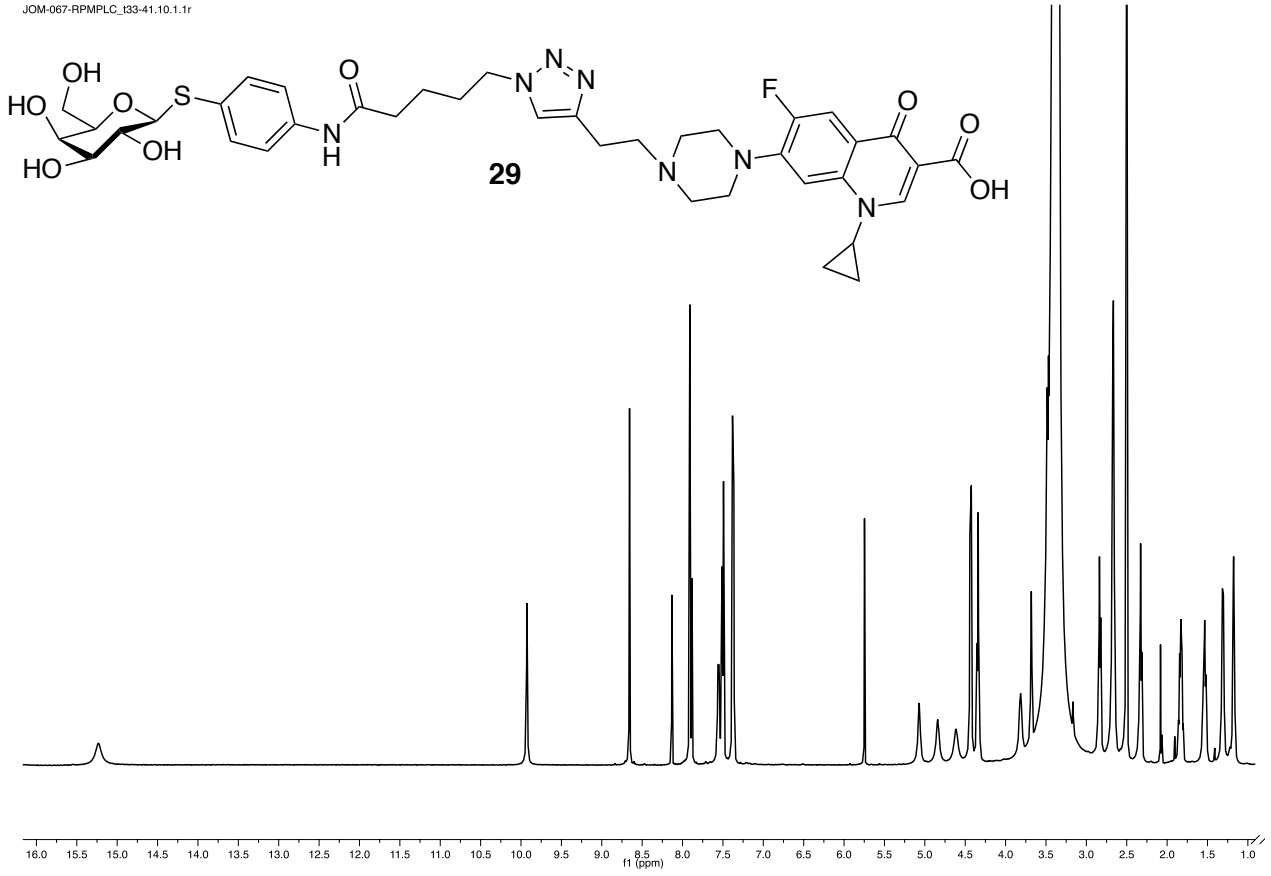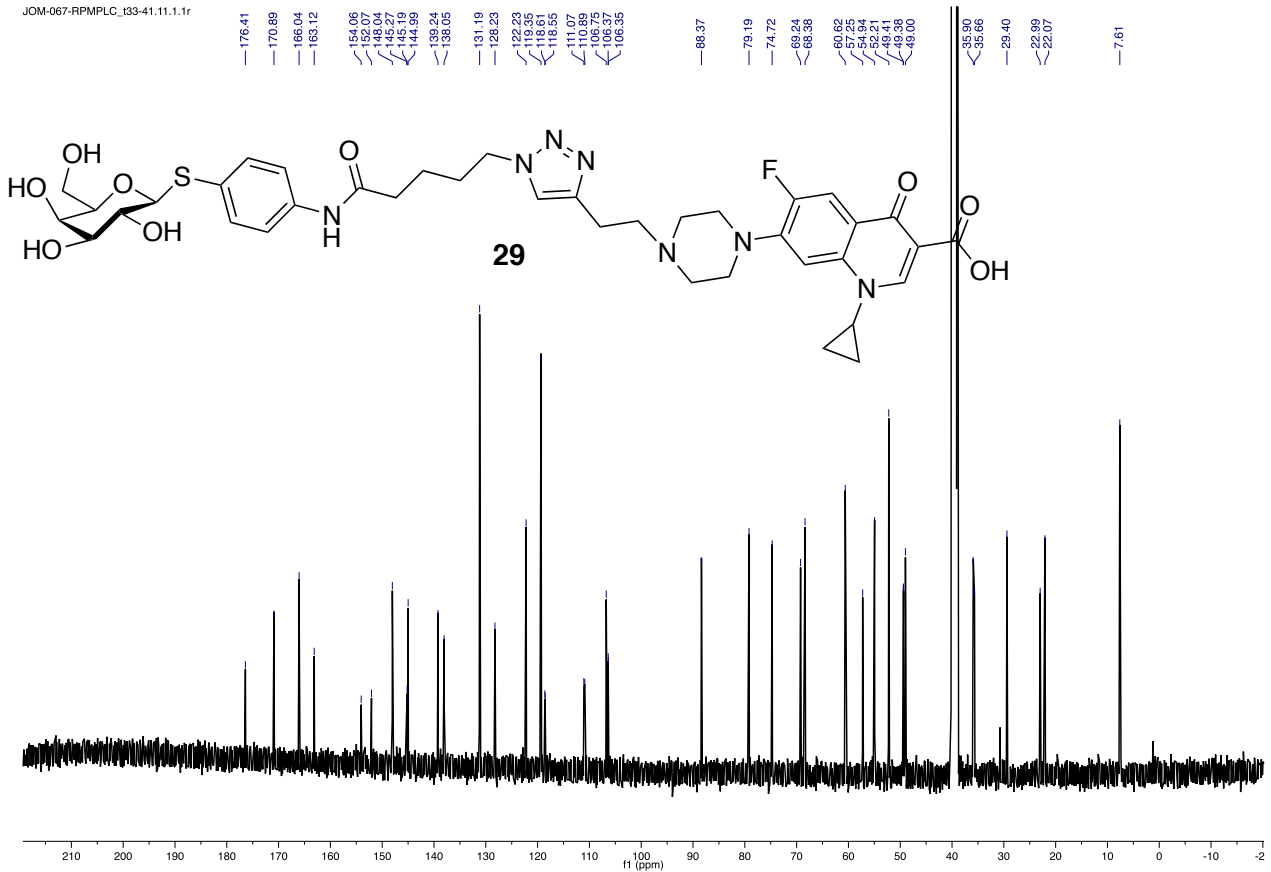

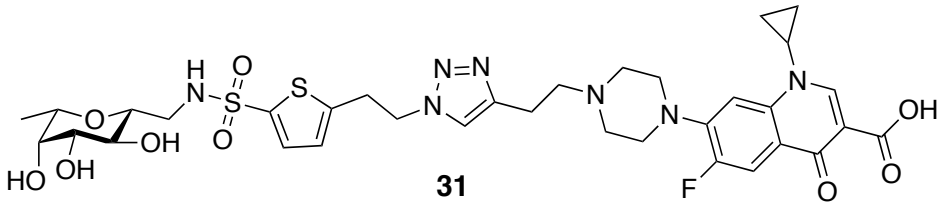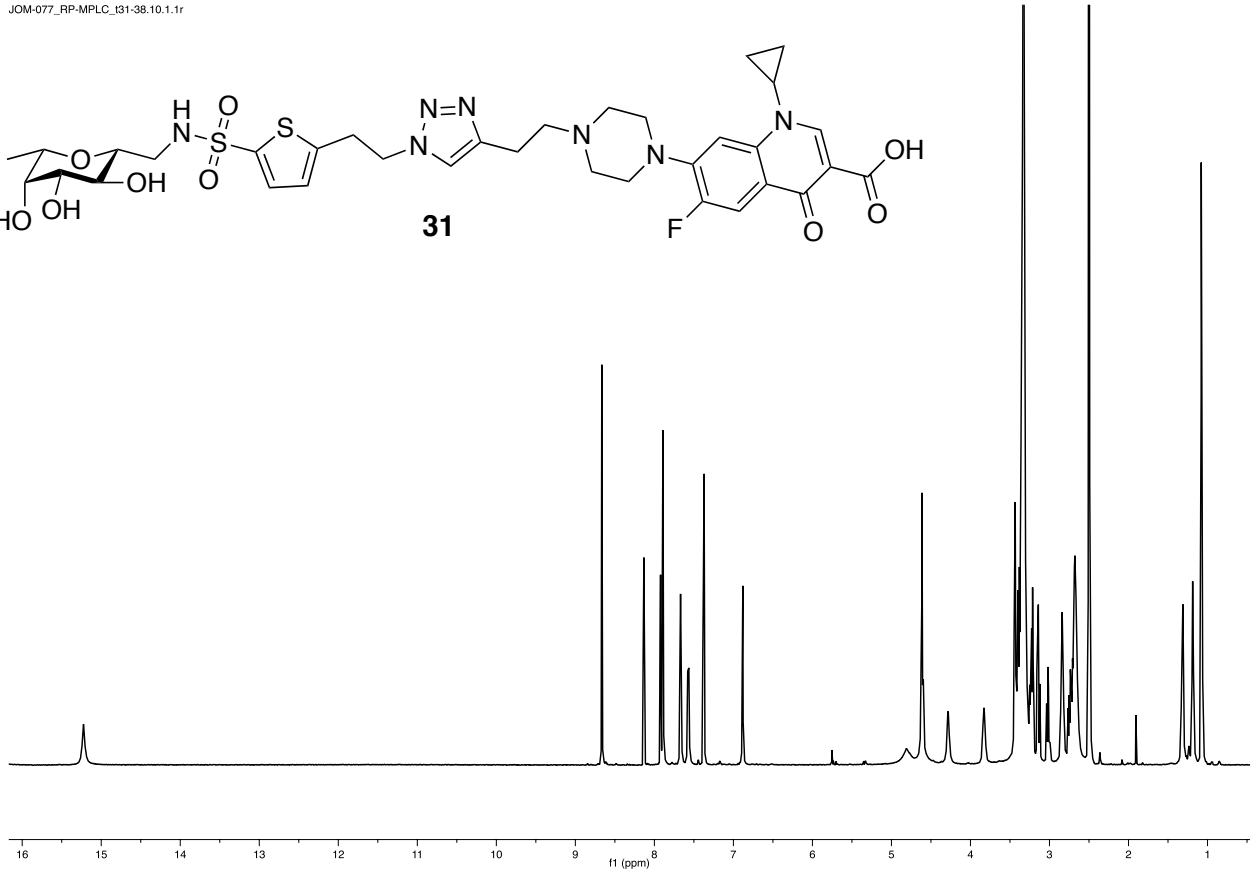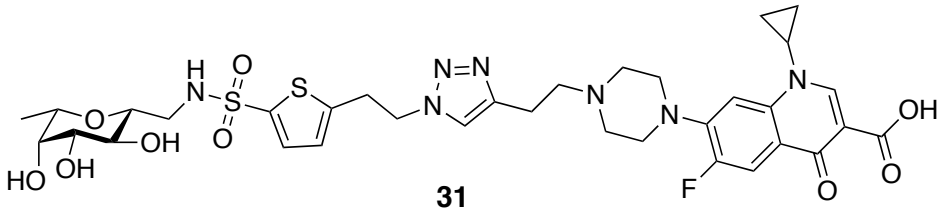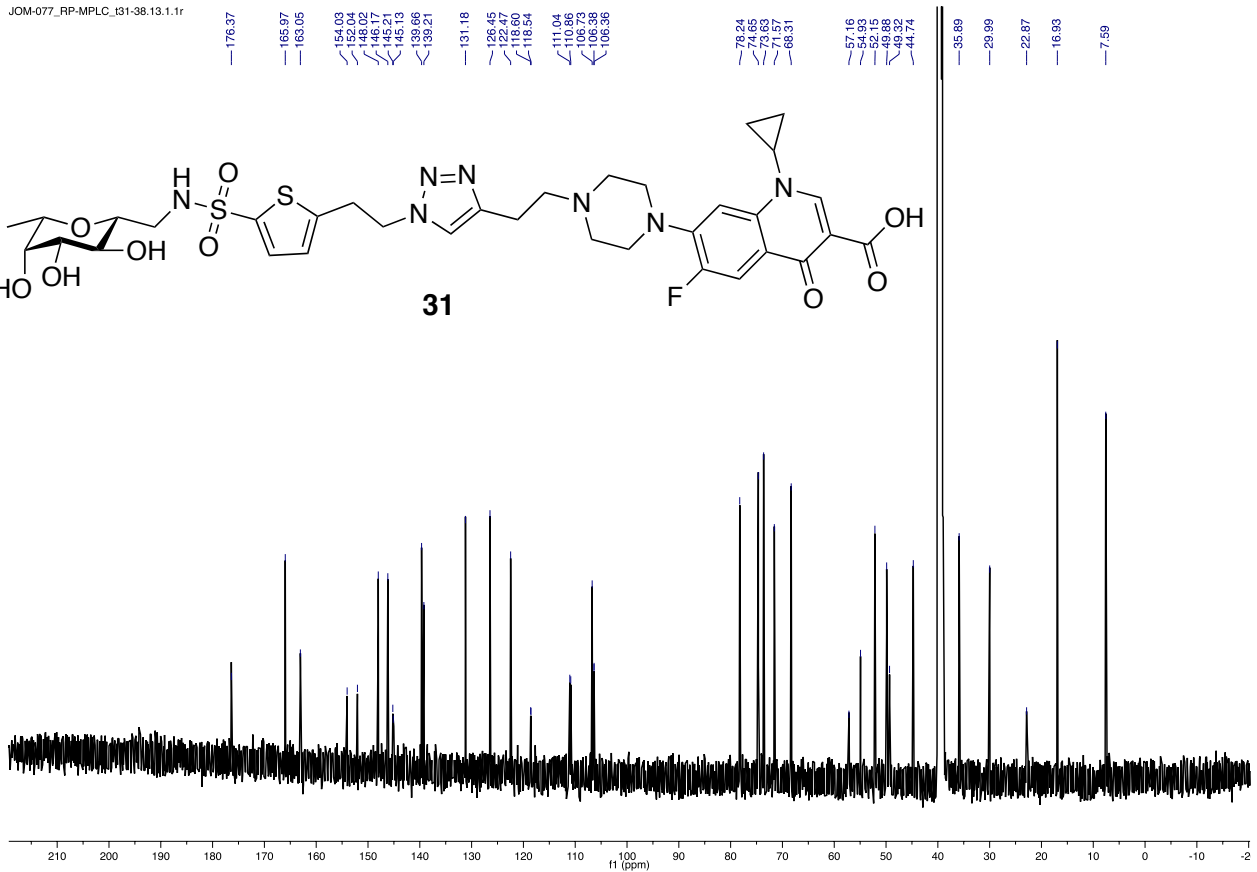



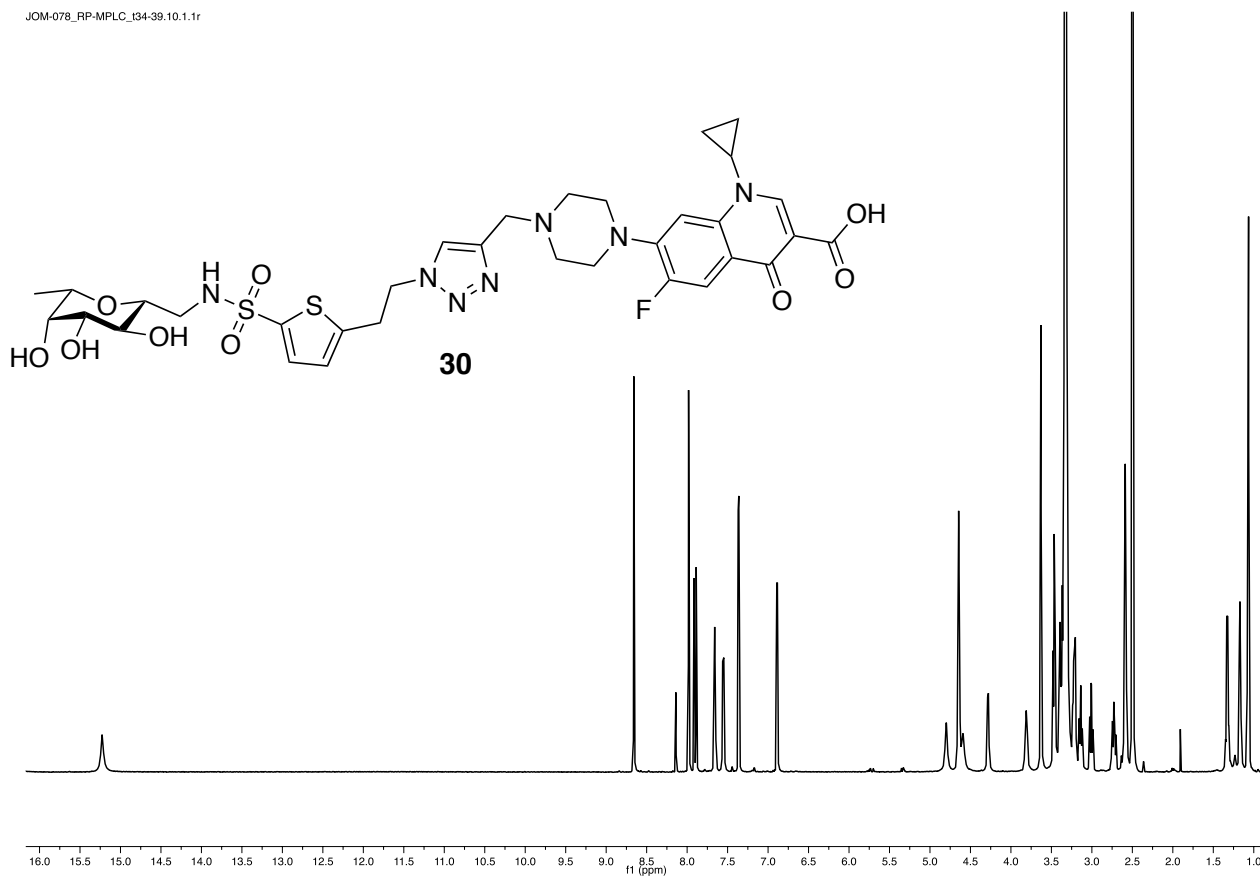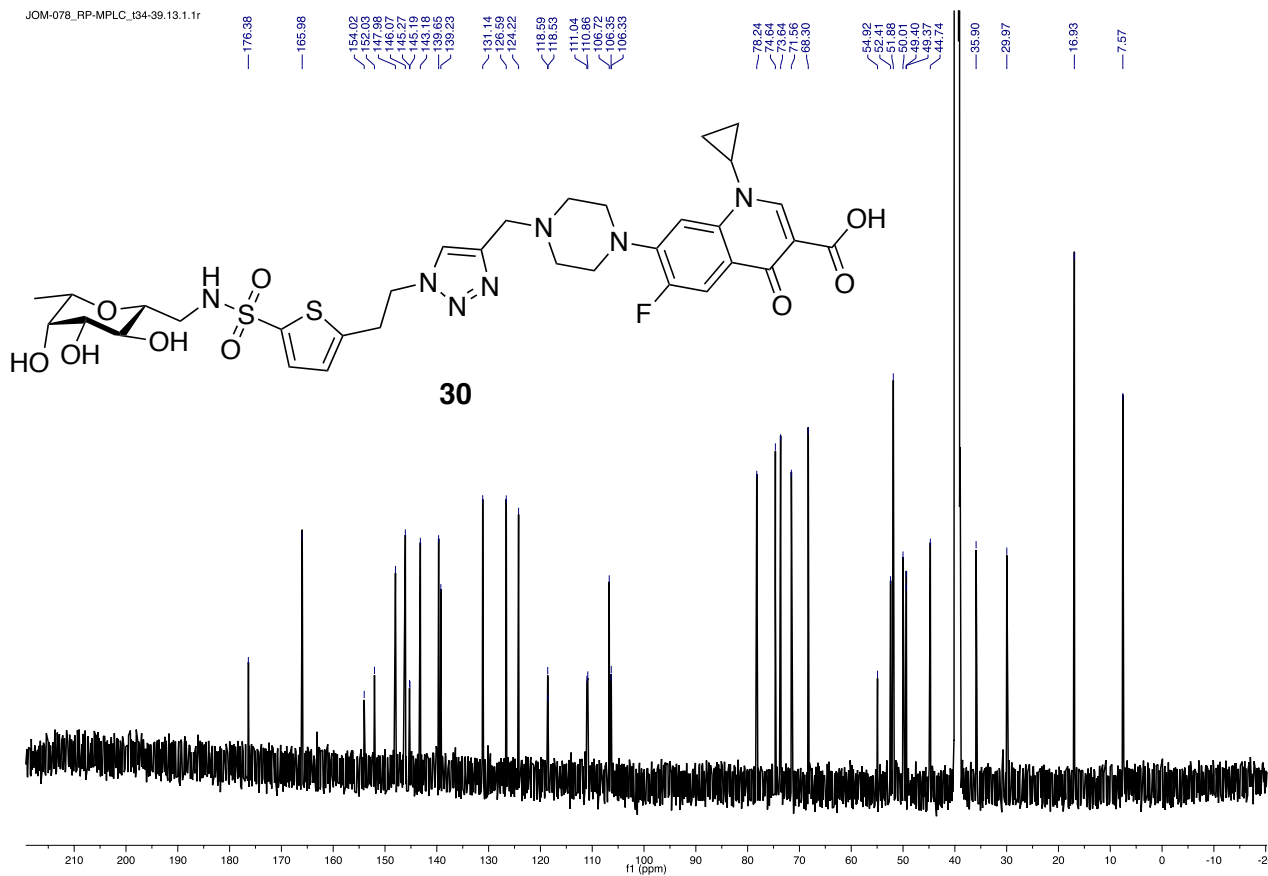

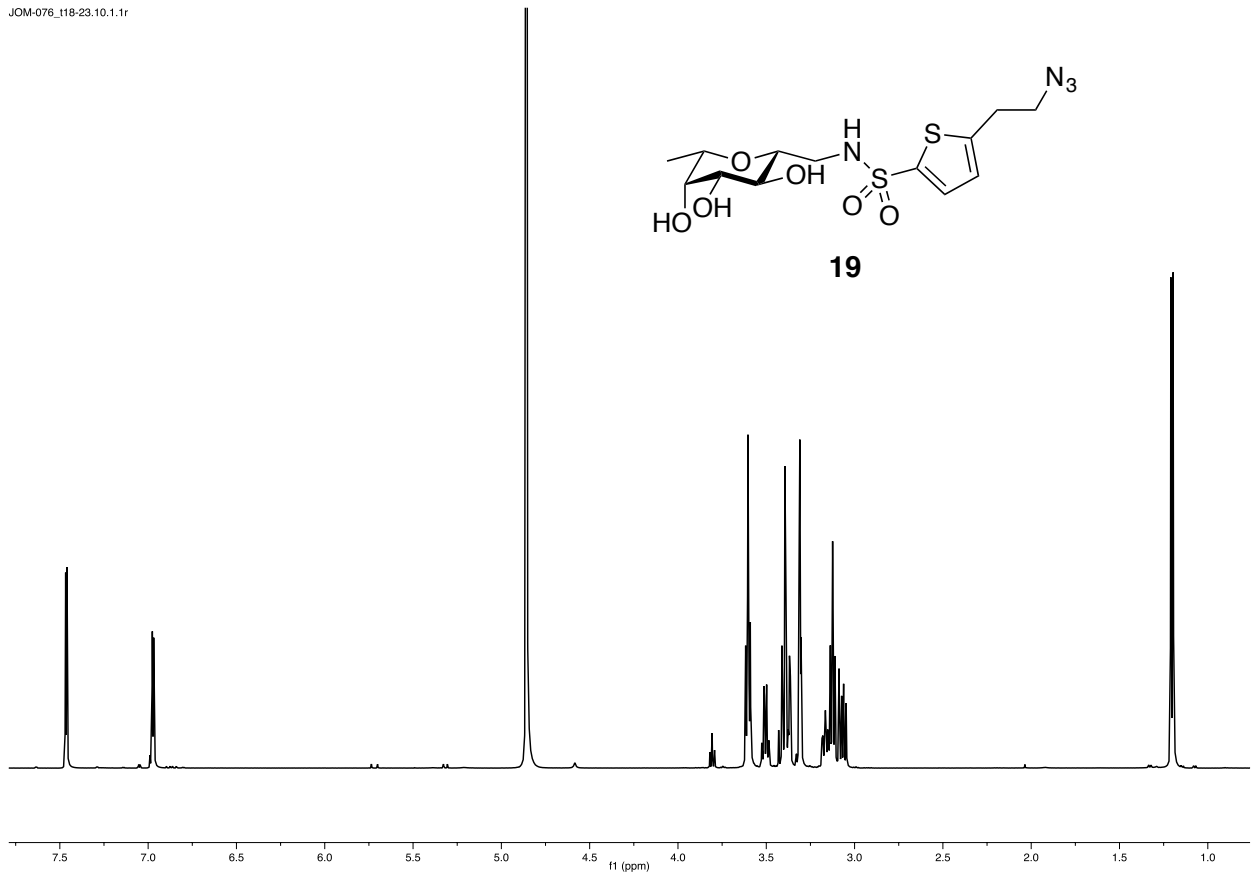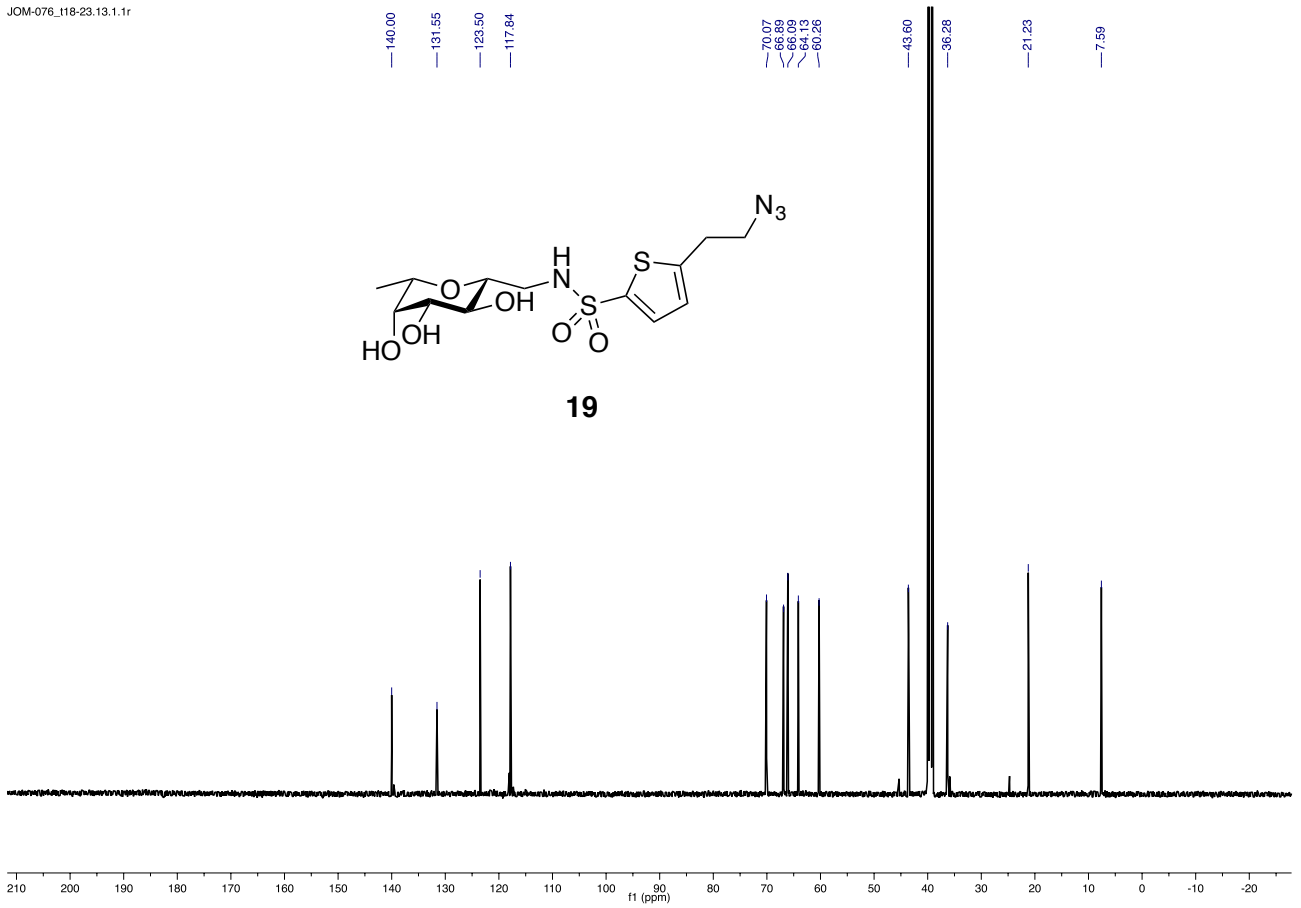

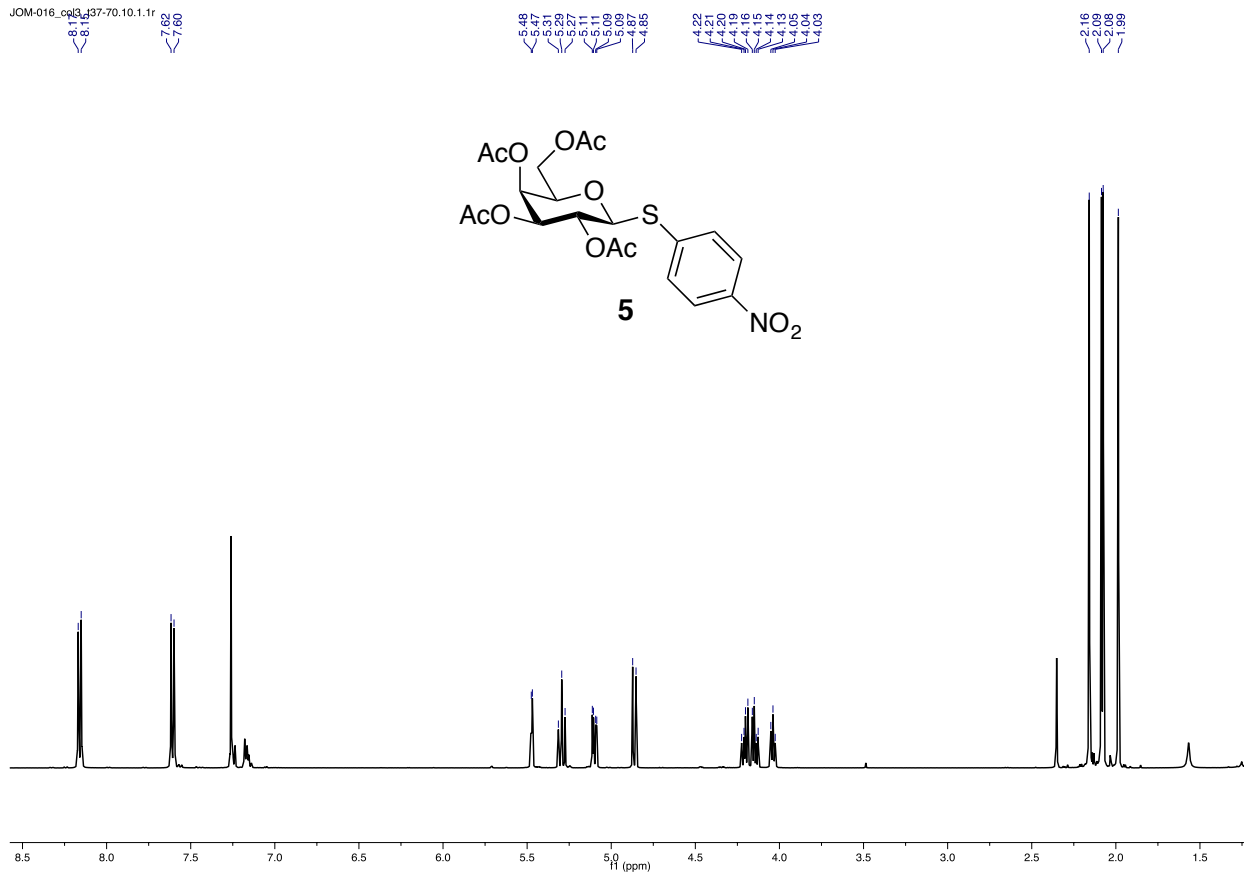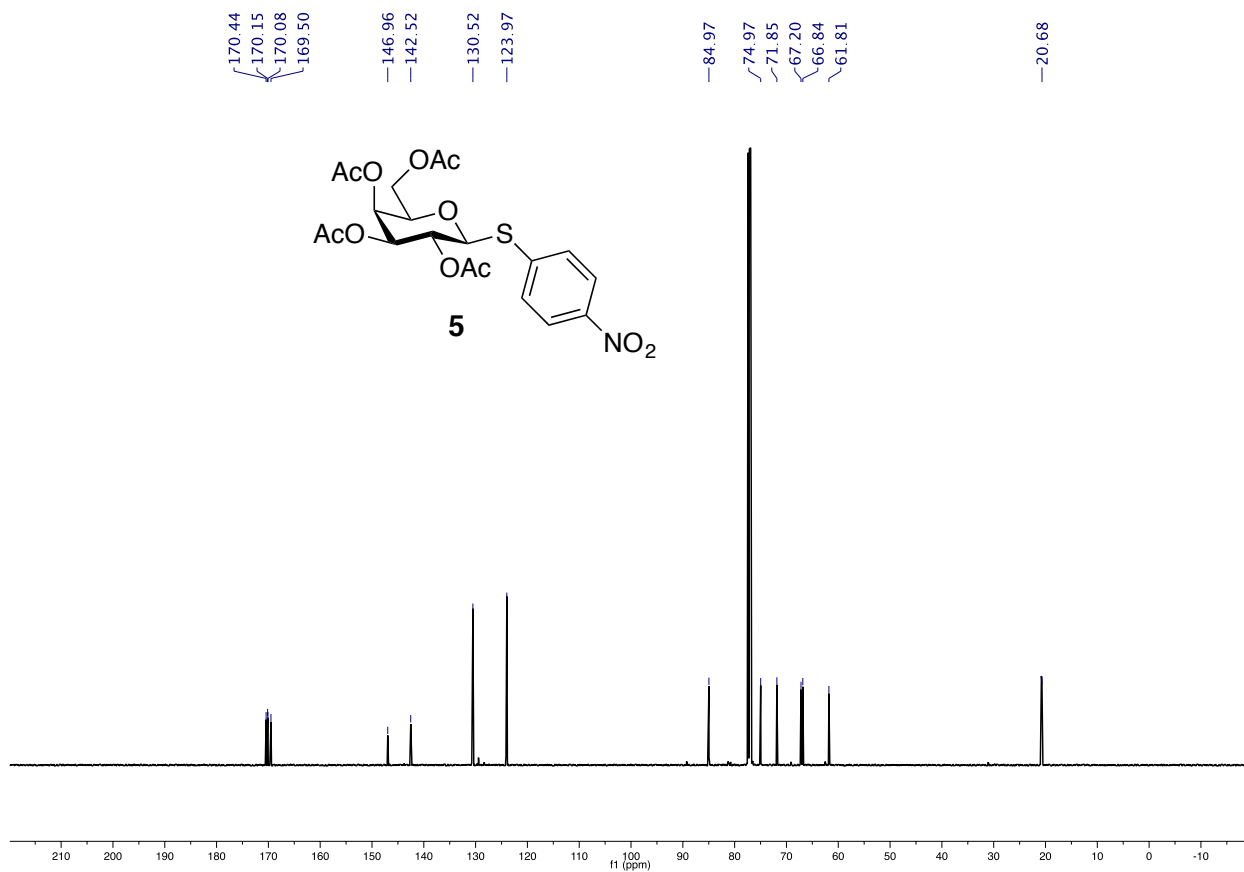

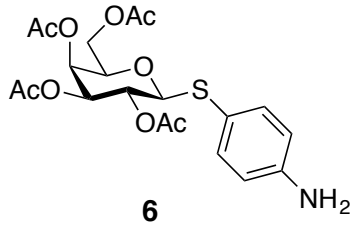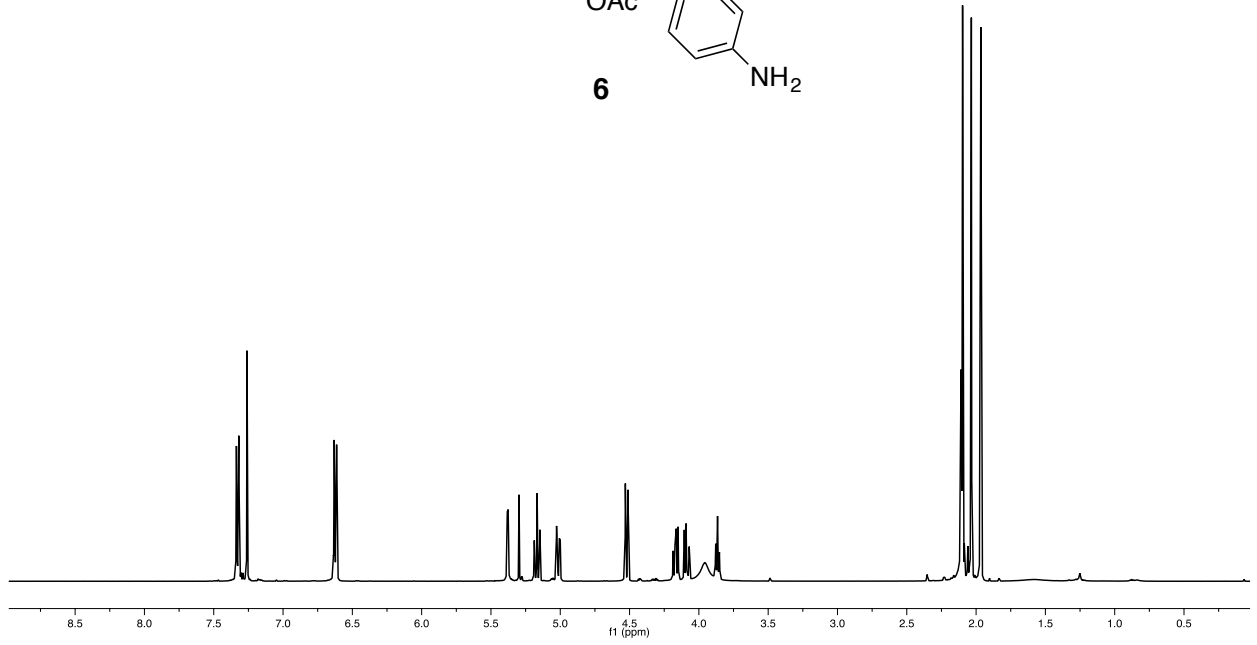

ZAA-014\_DMSO\_carbon\_40.f1

169.09  
168.84  
168.46  
168.17

149.42

135.15

115.20  
114.07

86.07

73.25  
71.20  
67.92  
67.24

61.86

20.63  
20.51  
20.40  
20.36

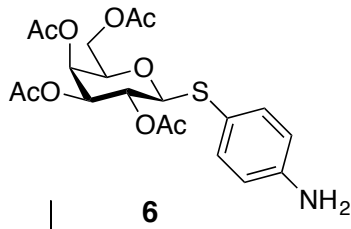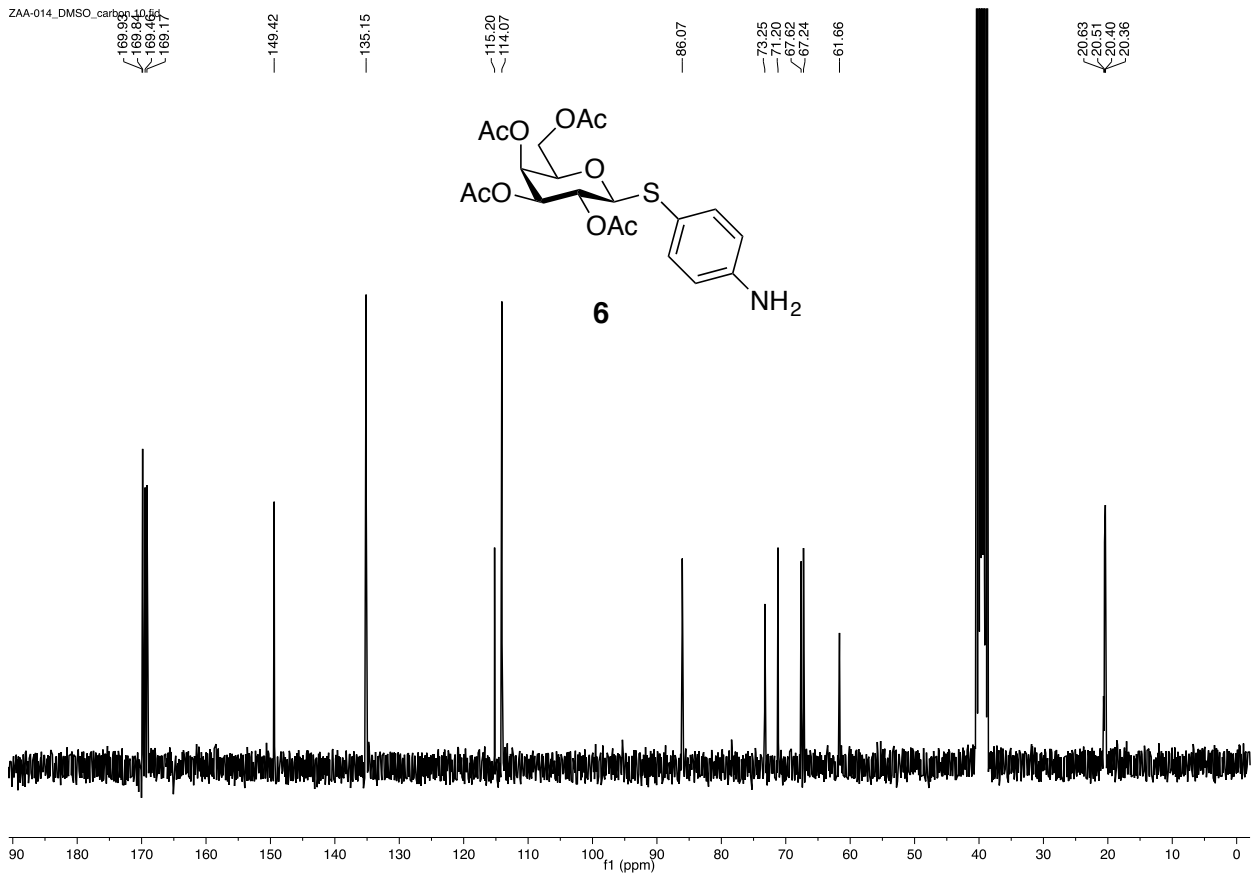

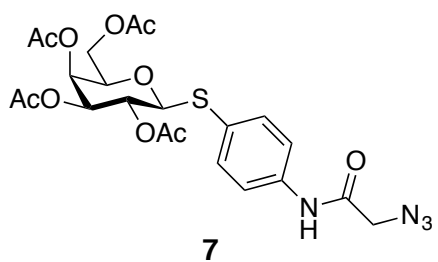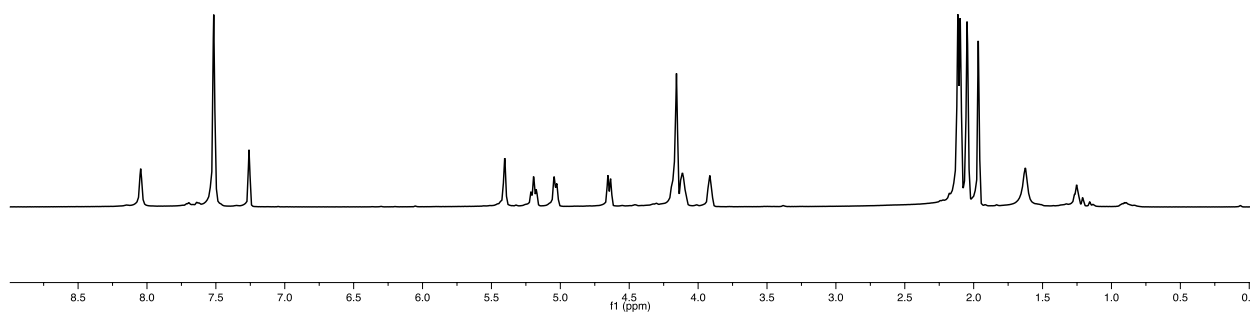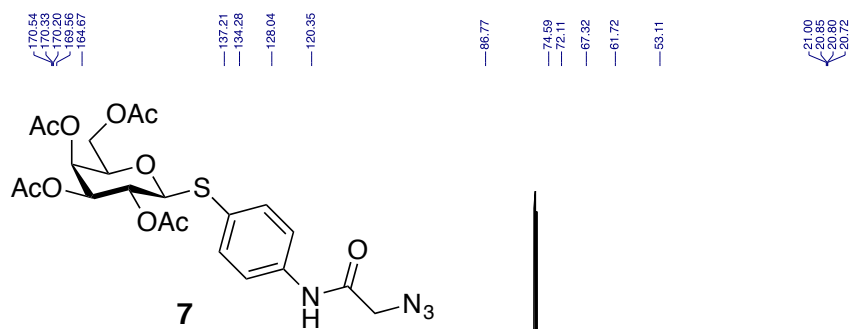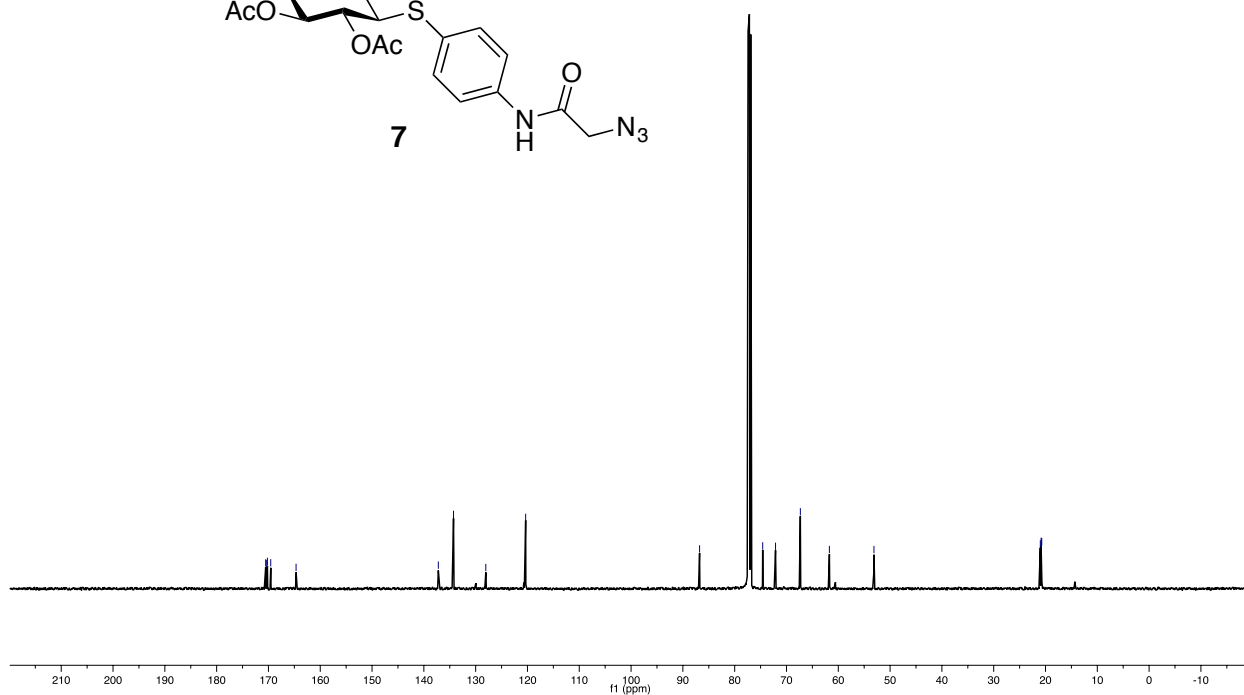

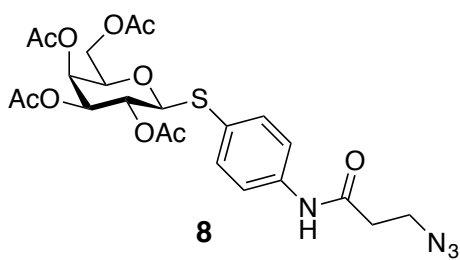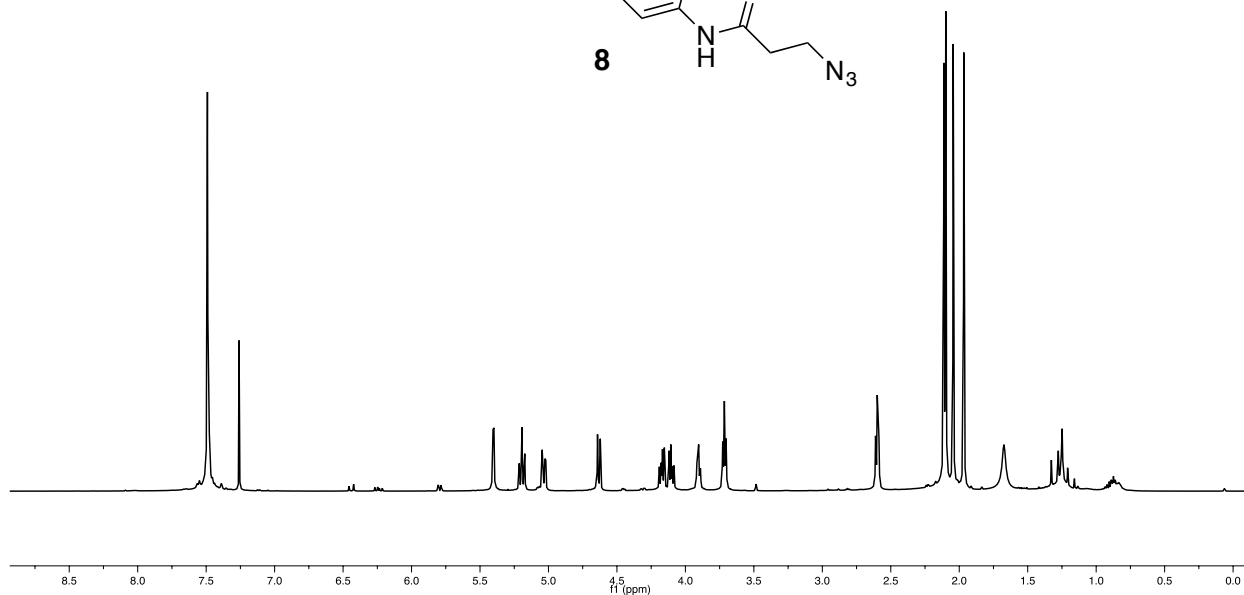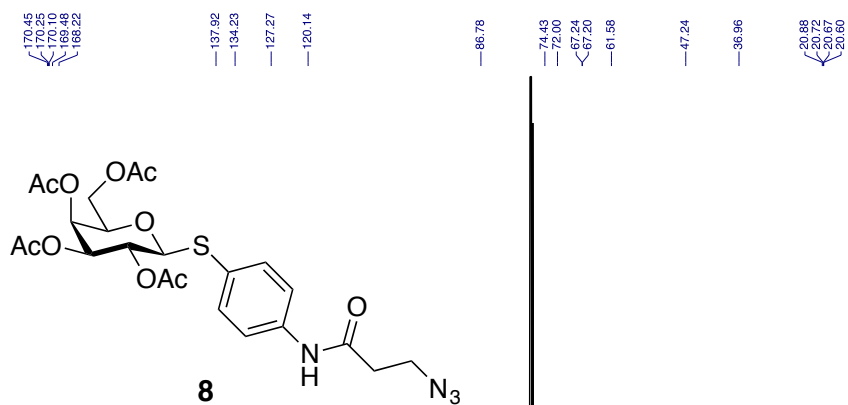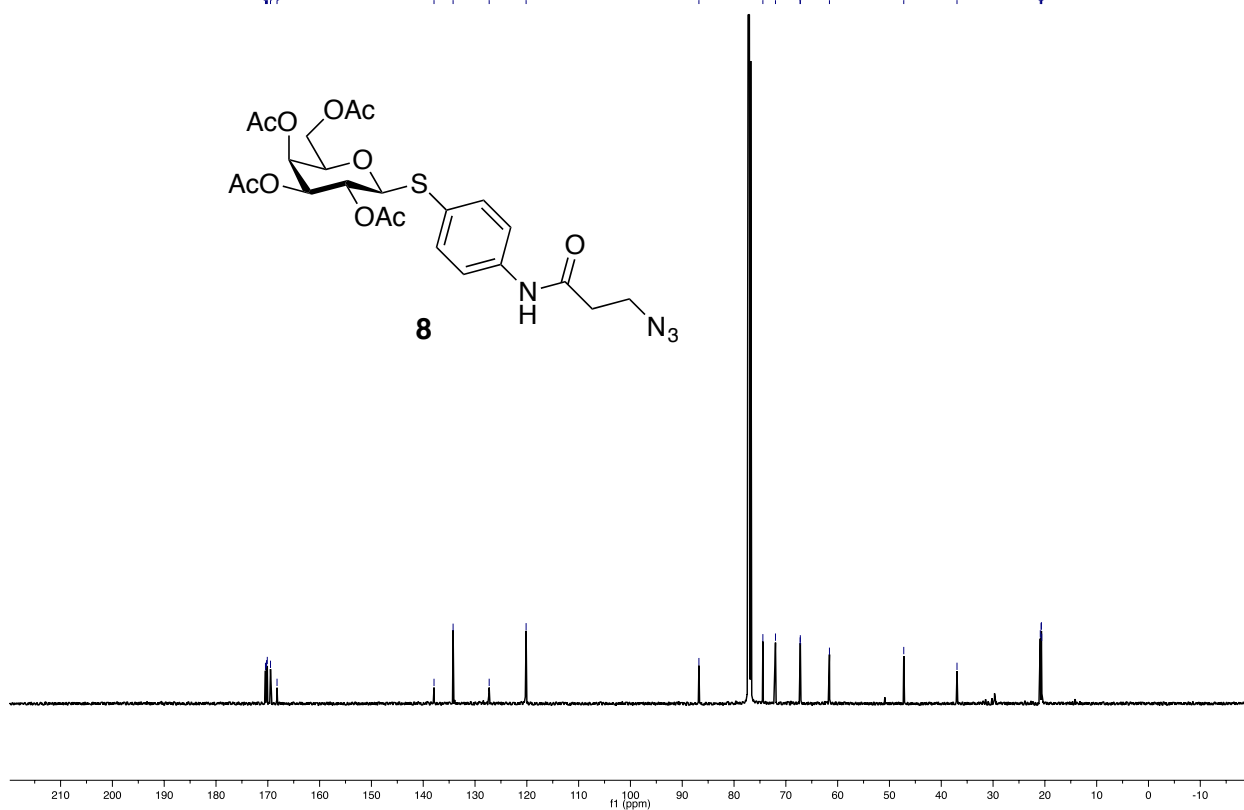

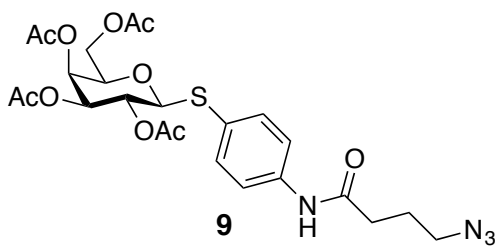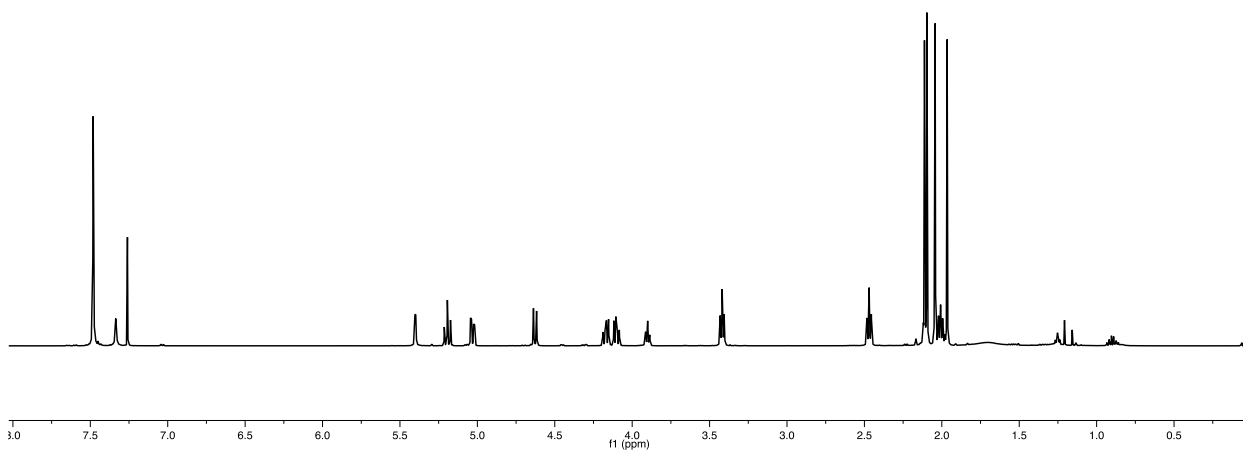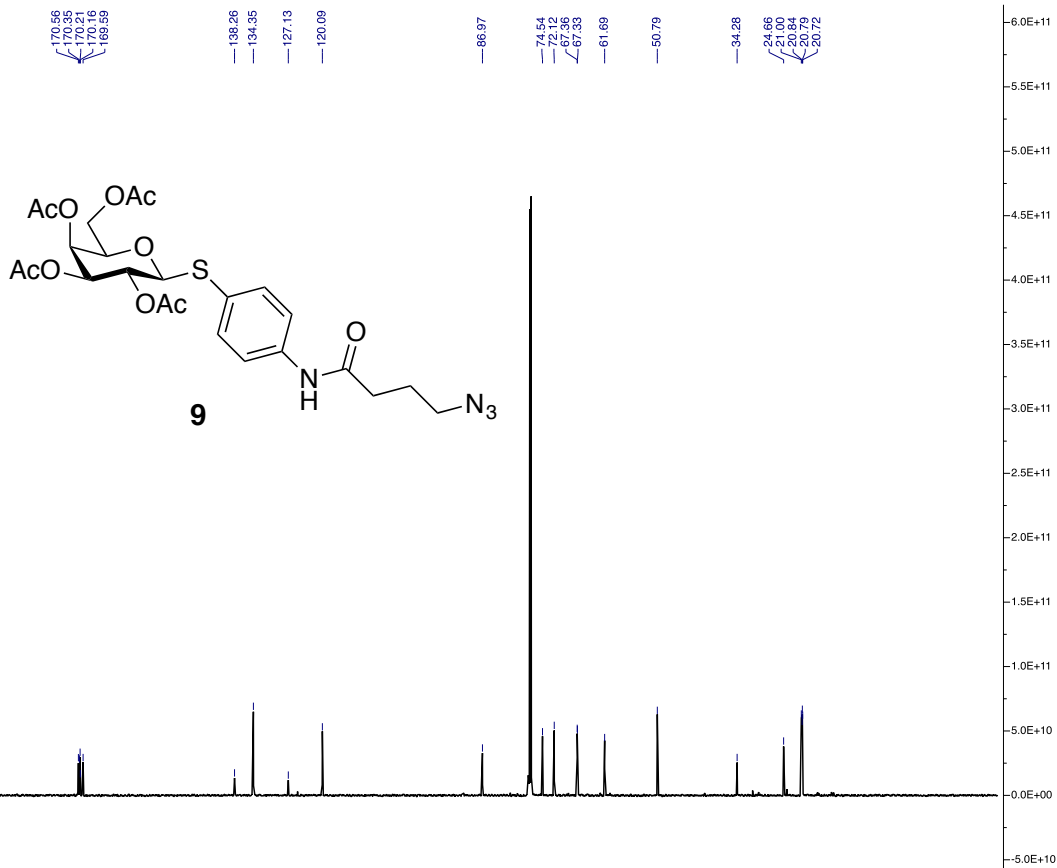

JOM-060\_120-25.10.1.1r

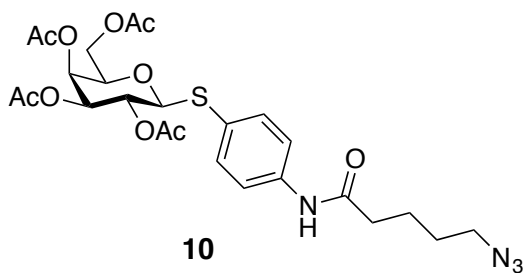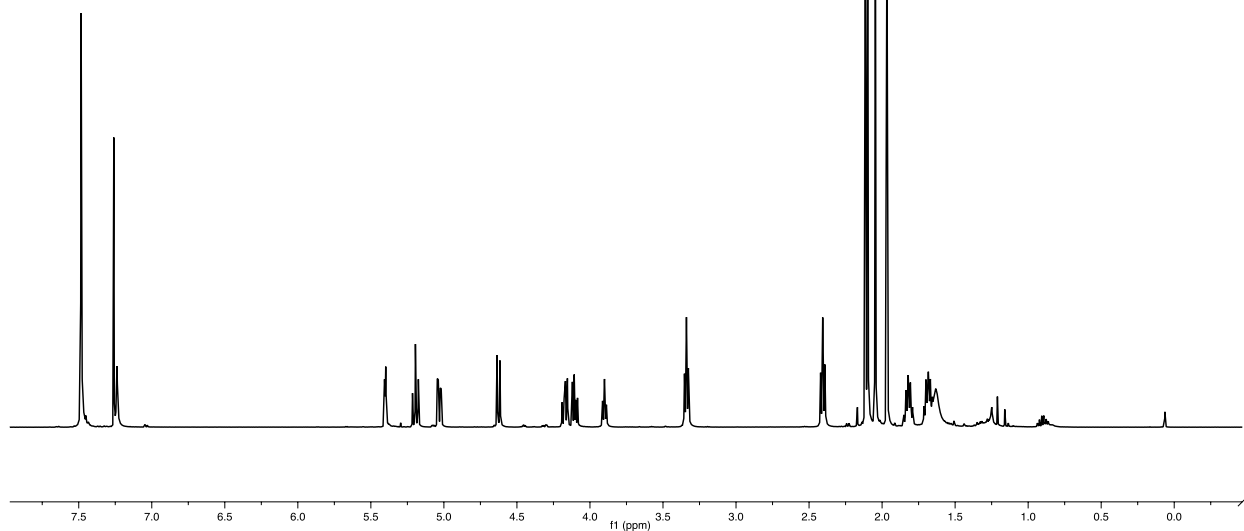

JOM-060\_120-25.20.1.1r

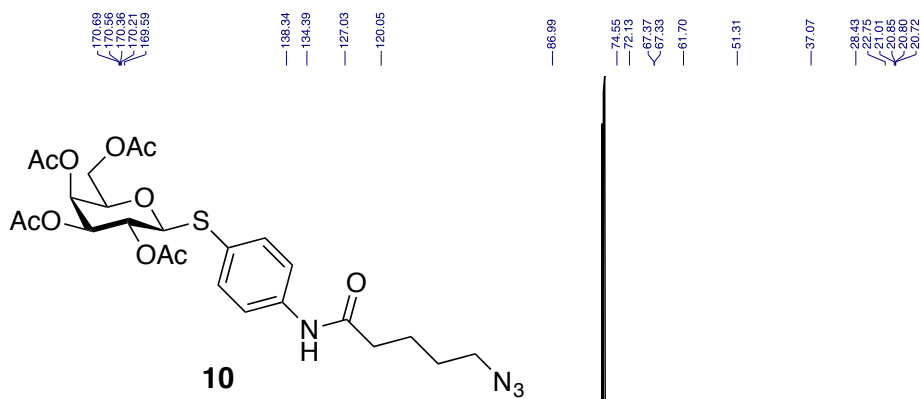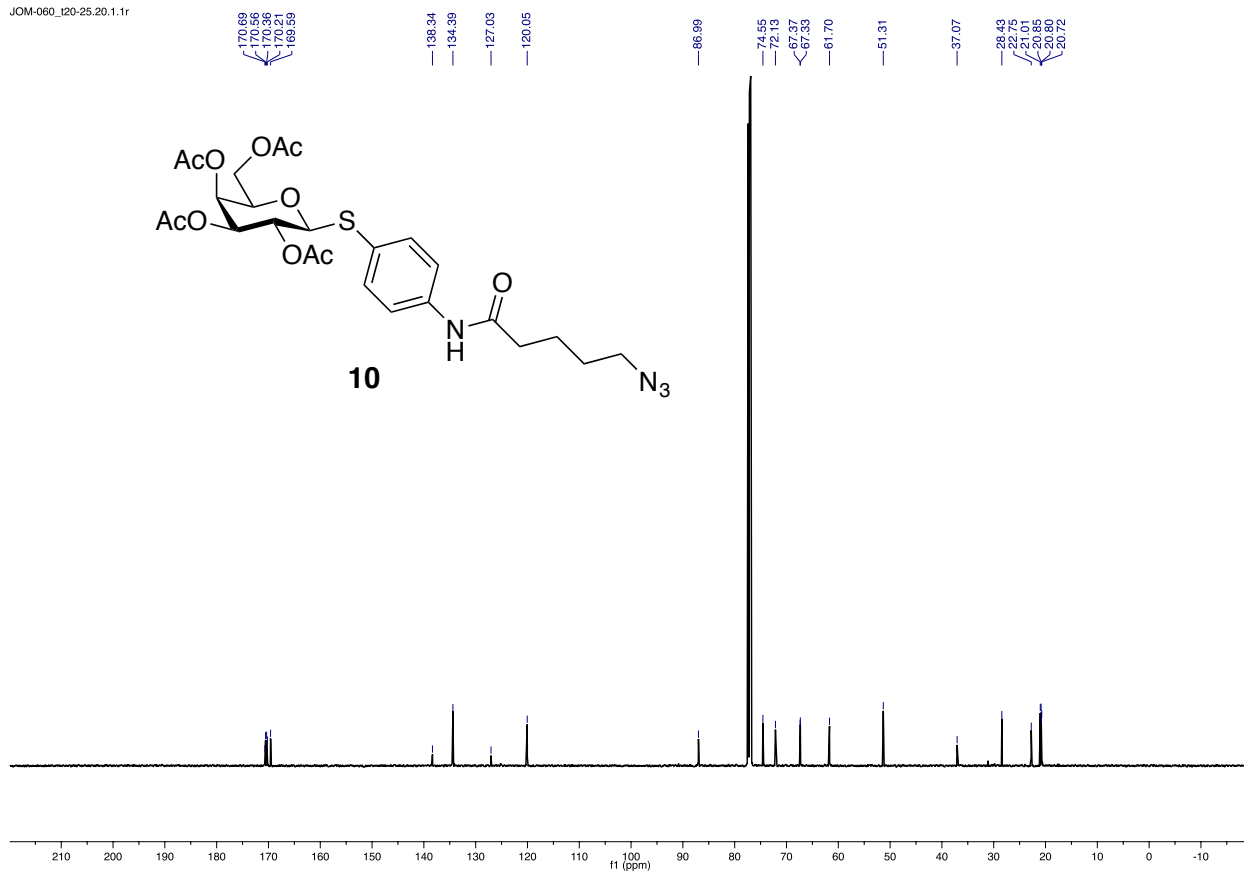



Figure S1: representative Gels for each compound in gyrase-catalyzed DNA supercoiling inhibition assays.

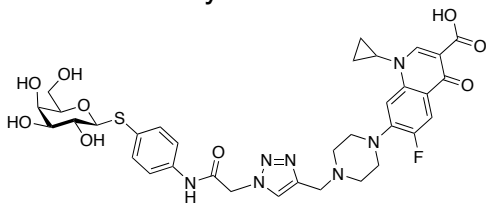

**22**

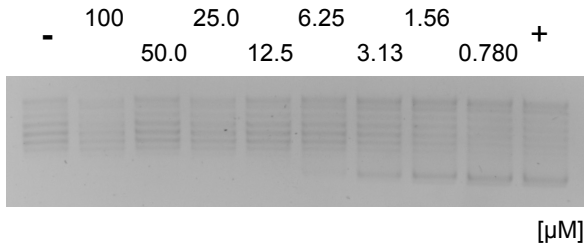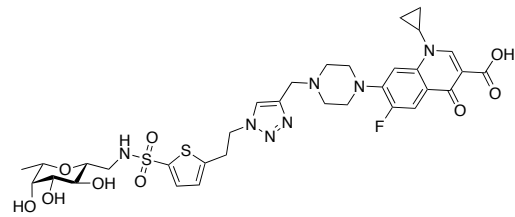

**30**

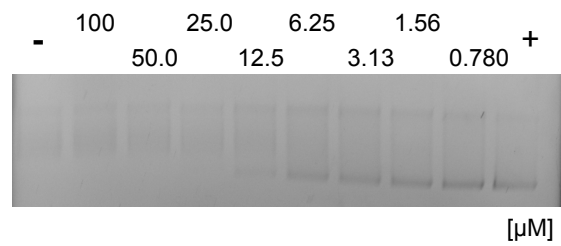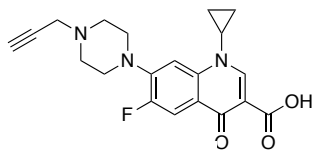

**20**

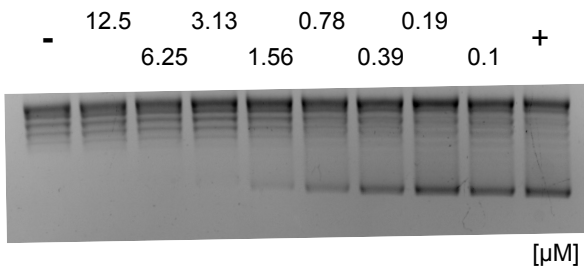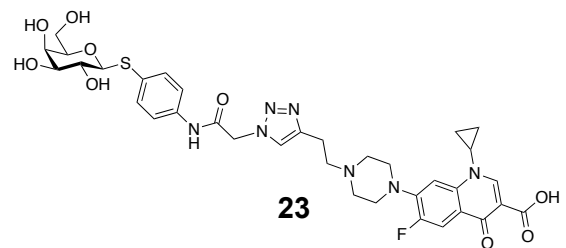

**23**

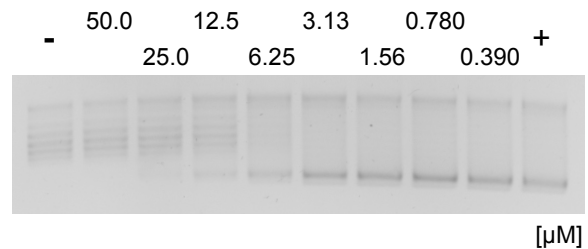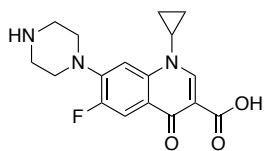

**3**

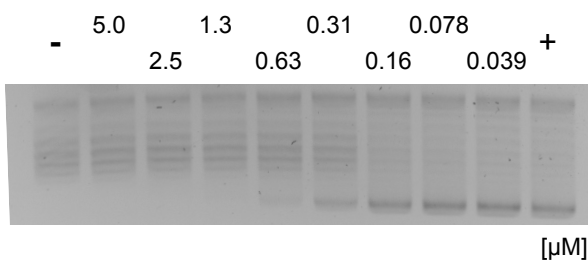

Figure S2: *P. aeruginosa* PAO1 biofilm accumulation raw data.

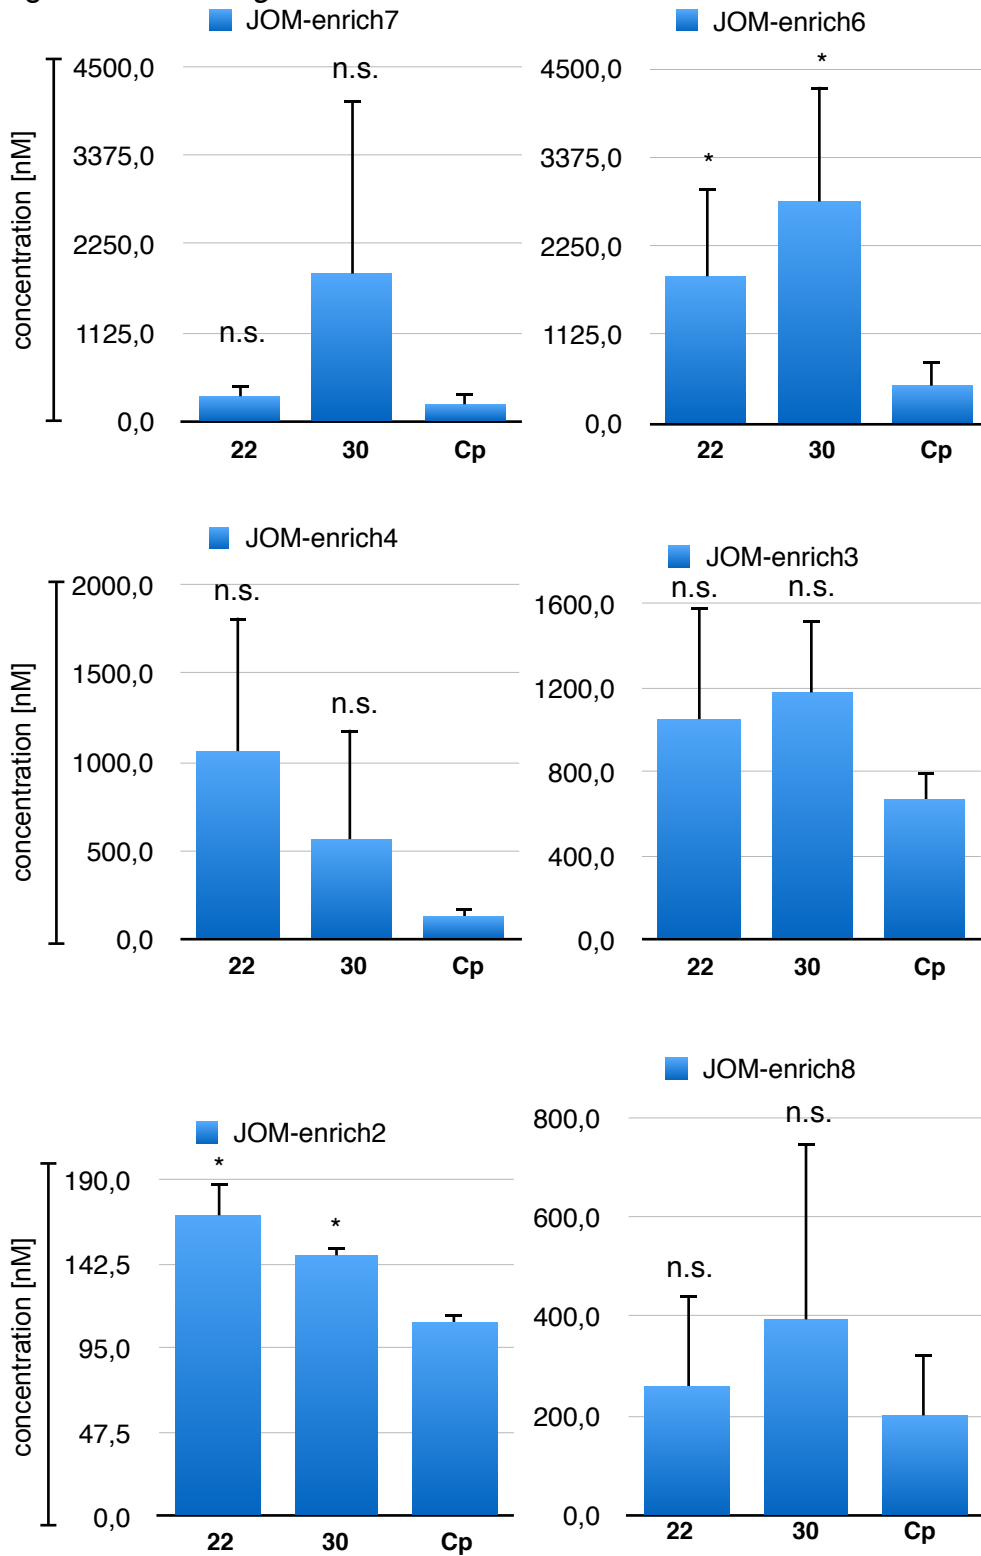

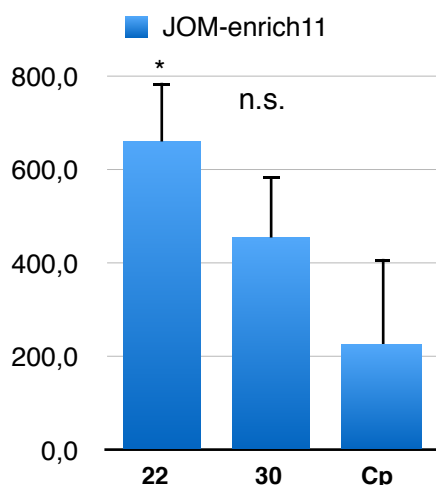

Table S1: Lectin inhibition, calculated as  $K_i$  [ $\mu\text{M}$ ] from  $\text{IC}_{50}$  according to Huang et al. [1]. N.a. = not applicable. Data is comparable to experimental  $K_i$ -values, determined by ITC. [2]

| LecA                                |   |             |                                         |                                                    | LecB <sub>PAO1</sub>                |                                     |                                         |                                                    |                  |
|-------------------------------------|---|-------------|-----------------------------------------|----------------------------------------------------|-------------------------------------|-------------------------------------|-----------------------------------------|----------------------------------------------------|------------------|
| compound                            | n | m           | $K_i \pm \text{s.d.}$ [ $\mu\text{M}$ ] | $\text{IC}_{50} \pm \text{s.d.}$ [ $\mu\text{M}$ ] | compound                            | m                                   | $K_i \pm \text{s.d.}$ [ $\mu\text{M}$ ] | $\text{IC}_{50} \pm \text{s.d.}$ [ $\mu\text{M}$ ] |                  |
| 11                                  | 1 | LecA-probes | $4.16 \pm 2.99$                         | $31.7 \pm 11$                                      | 19                                  | LecB-probe                          | $1.52 \pm 0.72$                         | $3.91 \pm 1.6$                                     |                  |
| 12                                  | 2 |             | $3.96 \pm 2.33$                         | $30.9 \pm 8.7$                                     | 30                                  | 0                                   | $0.82 \pm 0.55$                         | $2.37 \pm 1.2$                                     |                  |
| 13                                  | 3 |             | $4.01 \pm 2.22$                         | $31.1 \pm 8.3$                                     | 31                                  | 1                                   | $0.89 \pm 0.39$                         | $2.53 \pm 0.87$                                    |                  |
| 14                                  | 4 |             | $3.67 \pm 2.54$                         | $29.9 \pm 9.5$                                     | <b>Me-<math>\alpha</math>-D-Man</b> |                                     | $75.11 \pm 9.79$                        | $166 \pm 22$                                       |                  |
| 22                                  | 1 |             | 0                                       | $3.82 \pm 2.13$                                    | $30.4 \pm 8.0$                      | <b>L-Fuc</b>                        | controls                                | $0.93 \pm 0.78$                                    | $2.63 \pm 1.7$   |
| 23                                  | 1 |             | 1                                       | $1.48 \pm 1.47$                                    | $21.6 \pm 5.5$                      | <b>Me-<math>\alpha</math>-L-Fuc</b> |                                         | n.a.                                               | $0.534 \pm 0.07$ |
| 24                                  | 2 |             | 0                                       | $4.29 \pm 0.87$                                    | $32.2 \pm 3.3$                      | LecB <sub>PA14</sub>                |                                         |                                                    |                  |
| 25                                  | 2 |             | 1                                       | $3.19 \pm 0.48$                                    | $28.0 \pm 1.8$                      | 19                                  | LecB-probe                              | $0.36 \pm 0.04$                                    | $1.87 \pm 0.21$  |
| 26                                  | 3 |             | 0                                       | $3.00 \pm 1.08$                                    | $27.3 \pm 4.0$                      | 30                                  | 0                                       | $0.18 \pm 0.01$                                    | $2.24 \pm 0.23$  |
| 27                                  | 3 |             | 1                                       | $3.53 \pm 0.99$                                    | $29.3 \pm 3.7$                      | 31                                  | 1                                       | $0.44 \pm 0.05$                                    | $1.00 \pm 0.06$  |
| 28                                  | 4 | 0           | $3.27 \pm 2.17$                         | $28.3 \pm 8.1$                                     | <b>Me-<math>\alpha</math>-D-Man</b> |                                     | $21.21 \pm 2.08$                        | $101 \pm 10$                                       |                  |
| 29                                  | 4 | 1           | $2.70 \pm 0.64$                         | $26.2 \pm 2.4$                                     | <b>L-Fuc</b>                        | controls                            | $0.49 \pm 0.07$                         | $2.46 \pm 0.33$                                    |                  |
| <b>Me-<math>\alpha</math>-D-Gal</b> |   |             | $9.76 \pm 3.53$                         | $71.7 \pm 16$                                      | <b>Me-<math>\alpha</math>-L-Fuc</b> |                                     | $0.14 \pm 0.02$                         | $0.79 \pm 0.11$                                    |                  |
| <b>pNP-<math>\beta</math>-D-Gal</b> |   | controls    | $14.8 \pm 4.25$                         | $52.7 \pm 13$                                      |                                     |                                     |                                         |                                                    |                  |

Table S2: Antibiotic susceptibility assay data in molar concentration [ $\mu$ M].

| compound                                         | target: LecA                   |           |           |         |           |          |            |           |           |           |             | target: LecB |    |   | references |  |
|--------------------------------------------------|--------------------------------|-----------|-----------|---------|-----------|----------|------------|-----------|-----------|-----------|-------------|--------------|----|---|------------|--|
|                                                  | 22                             | 23        | 24        | 25      | 26        | 27       | 28         | 29        | 30        | 31        | 20          | 3            | 20 | 3 |            |  |
| molecular mass [g/mol]                           | 739.8                          | 753.8     | 753.8     | 767.8   | 767.8     | 781.9    | 781.9      | 795.9     | 761.8     | 775.9     | 369.4       | 331.3        |    |   |            |  |
| linker length n/m                                | 1/0                            | 1/1       | 2/0       | 2/1     | 3/0       | 3/1      | 4/0        | 4/1       | -/0       | -/1       | 0           | -            |    |   |            |  |
| <b>test organism</b>                             | <b>MIC [<math>\mu</math>M]</b> |           |           |         |           |          |            |           |           |           |             |              |    |   |            |  |
| <i>E. coli</i> K12 MG1655                        | 2.7                            | 11 - 21   | 2.7       | 21      | 1.3 - 2.6 | 20       | 2.6 - 5.11 | 20        | 11 - 21   | 21        | n.d.        | <0.37        |    |   |            |  |
| <i>E. coli</i> DSM 1116                          | 2.7 - 5.4                      | 22        | 2.7 - 5.3 | 42      | 2.6 - 42  | 5.1 - 41 | 5.11 - 41  | 5 - 40    | 21 - 42   | 41        | n.d.        | <0.37        |    |   |            |  |
| <i>S. carnosus</i> <sup>(a)</sup>                | 43                             | 85        | 42        | >83     | 21        | 82       | 10         | $\geq$ 80 | >84       | >82       | n.d.        | <0.37        |    |   |            |  |
| <i>P. aeruginosa</i> PA14 wt                     | 22                             | $\geq$ 85 | 11 - 21   | >83     | 10 - 21   | >82      | 41         | >80       | 84        | >82       | 5.4 - 10.8  | 0.075 - 0.3  |    |   |            |  |
| <i>P. aeruginosa</i> PA14 + 1 $\mu$ g/mL PMBN    | 5.4 - 22                       | 21 - 85   | 11 - 21   | 42 - 83 | 5.2       | 41 - 82  | 2.6 - 10   | 40 - 80   | 84        | 82        | 0.068 - 1.4 | 0.075        |    |   |            |  |
| <i>P. aeruginosa</i> PA14 $\Delta$ lecA          | 22 - 44                        | $\geq$ 85 | 11 - 21   | >83     | 10 - 21   | >82      | 41         | >80       | $\geq$ 84 | >82       | 11 - 22     | 0.15-0.24    |    |   |            |  |
| <i>P. aeruginosa</i> PA14 $\Delta$ lecB          | 22 - 44                        | $\geq$ 85 | 11 - 42   | >83     | 10 - 21   | >82      | 41 - 82    | >80       | 84        | >82       | 11          | 0.15-0.24    |    |   |            |  |
| <i>P. aeruginosa</i> PAO1 wt                     | 22 - 44                        | >85       | 21        | >83     | 21 - 42   | >82      | 41 - 82    | >80       | $\geq$ 84 | >82       | 11 - 22     | 0.075 - 0.24 |    |   |            |  |
| <i>P. aeruginosa</i> PAO1 wt + 1 $\mu$ g/mL PMBN | 5.4 - 11                       | 42 - 85   | 5.3 - 11  | 42 - 83 | 5.2 - 10  | 41 - 82  | 10 - 20    | 40 - 80   | 42 - 84   | $\geq$ 82 | 2.7 - 5.4   | 0.075-0.15   |    |   |            |  |

n.d. = not determined, <sup>(a)</sup> DSM 20501

| compound | SMILE                                                                                                                                           | IC <sub>50</sub> LecA<br>± s.d. [μM] | IC <sub>50</sub> LecB <sub>PAO1</sub><br>± s.d. [μM] | IC <sub>50</sub> LecB <sub>PA14</sub><br>± s.d. [μM] |
|----------|-------------------------------------------------------------------------------------------------------------------------------------------------|--------------------------------------|------------------------------------------------------|------------------------------------------------------|
| 11       | <chem>O[C@H]1[C@@H](O)[C@@H](CO)O[C@@H](SC2=CC=C(NC(CN=[N+]=[N-])=O)C=C2)[C@@H]1O</chem>                                                        | 31.7 ± 11                            | n.a.                                                 | n.a.                                                 |
| 12       | <chem>O[C@H]1[C@@H](O)[C@@H](CO)O[C@@H](SC2=CC=C(NC(CCN=[N+]=[N-])=O)C=C2)[C@@H]1O</chem>                                                       | 30.9 ± 8.7                           | n.a.                                                 | n.a.                                                 |
| 13       | <chem>O[C@H]1[C@@H](O)[C@@H](CO)O[C@@H](SC2=CC=C(NC(CCCN=[N+]=[N-])=O)C=C2)[C@@H]1O</chem>                                                      | 31.1 ± 8.3                           | n.a.                                                 | n.a.                                                 |
| 14       | <chem>O[C@H]1[C@@H](O)[C@@H](CO)O[C@@H](SC2=CC=C(NC(CCCCN=[N+]=[N-])=O)C=C2)[C@@H]1O</chem>                                                     | 29.9 ± 9.5                           | n.a.                                                 | n.a.                                                 |
| 19       | <chem>C[C@H]1[C@@H](O)[C@@H](O)[C@H](O)[C@@H](CNS(C2=CC=C(CCN=[N+]=[N-])S2)(=O)=O)O1</chem>                                                     | n.a.                                 | 3.91 ± 1.6                                           | 1.87 ± 0.21                                          |
| 20       | <chem>O=C(O)C1=CN(C2=CC(N3CCN(CCC#C)CC3)=C(F)C=C2C1=O)C4CC4</chem>                                                                              | n.a.                                 | n.a.                                                 | n.a.                                                 |
| 21       | <chem>O=C(O)C1=CN(C2=CC(N3CCN(CCC#C)CC3)=C(F)C=C2C1=O)C4CC4</chem>                                                                              | n.a.                                 | n.a.                                                 | n.a.                                                 |
| 22       | <chem>O=C(O)C1=CN(C2=CC(N3CCN(CC4=CN(CC(NC(C=C5)=CC=C5S[C@H]6[C@H](O)[C@@H](O)[C@@H](O)[C@@H](CO)O6)=O)N=N4)CC3)=C(F)C=C2C1=O)C7CC7</chem>      | 30.4 ± 8.0                           | n.a.                                                 | n.a.                                                 |
| 23       | <chem>O[C@H]1[C@@H](O)[C@@H](CO)O[C@@H](SC2=CC=C(NC(CN3N=NC(CCN(CC4)CCN4C5=C(F)C=C6C(N(C7CC7)C=C(C6=O)C(O)=O)=C5)=C3)=O)C=C2)[C@@H]1O</chem>    | 21.6 ± 5.5                           | n.a.                                                 | n.a.                                                 |
| 24       | <chem>O=C(O)C1=CN(C2=CC(N3CCN(CC4=CN(CCC(NC(C=C5)=CC=C5S[C@H]6[C@H](O)[C@@H](O)[C@@H](O)[C@@H](CO)O6)=O)N=N4)CC3)=C(F)C=C2C1=O)C7CC7</chem>     | 32.2 ± 3.3                           | n.a.                                                 | n.a.                                                 |
| 25       | <chem>O[C@H]1[C@@H](O)[C@@H](CO)O[C@@H](SC2=CC=C(NC(CCN3N=NC(CCN(CC4)CCN4C5=C(F)C=C6C(N(C7CC7)C=C(C6=O)C(O)=O)=C5)=C3)=O)C=C2)[C@@H]1O</chem>   | 28.0 ± 1.8                           | n.a.                                                 | n.a.                                                 |
| 26       | <chem>O=C(O)C1=CN(C2=CC(N3CCN(CC4=CN(CCCC(NC(C=C5)=CC=C5S[C@H]6[C@H](O)[C@@H](O)[C@@H](O)[C@@H](CO)O6)=O)N=N4)CC3)=C(F)C=C2C1=O)C7CC7</chem>    | 27.3 ± 4.0                           | n.a.                                                 | n.a.                                                 |
| 27       | <chem>O[C@H]1[C@@H](O)[C@@H](CO)O[C@@H](SC2=CC=C(NC(CCCN3N=NC(CCN(CC4)CCN4C5=C(F)C=C6C(N(C7CC7)C=C(C6=O)C(O)=O)=C5)=C3)=O)C=C2)[C@@H]1O</chem>  | 29.3 ± 3.7                           | n.a.                                                 | n.a.                                                 |
| 28       | <chem>O[C@H]1[C@@H](O)[C@@H](CO)O[C@@H](SC2=CC=C(NC(CCCCN3N=NC(CN(CC4)CCN4C5=C(F)C=C6C(N(C7CC7)C=C(C6=O)C(O)=O)=C5)=C3)=O)C=C2)[C@@H]1O</chem>  | 28.3 ± 8.1                           | n.a.                                                 | n.a.                                                 |
| 29       | <chem>O[C@H]1[C@@H](O)[C@@H](CO)O[C@@H](SC2=CC=C(NC(CCCCN3N=NC(CCN(CC4)CCN4C5=C(F)C=C6C(N(C7CC7)C=C(C6=O)C(O)=O)=C5)=C3)=O)C=C2)[C@@H]1O</chem> | 26.2 ± 2.4                           | n.a.                                                 | n.a.                                                 |
| 30       | <chem>C[C@H]1[C@@H](O)[C@@H](O)[C@H](O)[C@@H](CNS(C2=CC=C(CCN3N=NC(CN(CC4)CCN4C5=C(F)C=C6C(N(C7CC7)C=C(C6=O)C(O)=O)=C5)=C3)S2)(=O)=O)O1</chem>  | n.a.                                 | 2.37 ± 1.2                                           | 2.24 ± 0.23                                          |
| 31       | <chem>C[C@H]1[C@@H](O)[C@@H](O)[C@H](O)[C@@H](CNS(C2=CC=C(CCN3N=NC(CCN(CC4)CCN4C5=C(F)C=C6C(N(C7CC7)C=C(C6=O)C(O)=O)=C5)=C3)S2)(=O)=O)O1</chem> | n.a.                                 | 2.53 ± 0.87                                          | 1.00 ± 0.06                                          |
| 5        | <chem>O=C(O)[C@H]1[C@@H](OC(C)=O)[C@@H](COC(C)=O)O[C@@H](SC2=CC=C(N+)([O-])=O)C=C2)[C@@H]1OC(C)=O)C</chem>                                      | n.a.                                 | n.a.                                                 | n.a.                                                 |
| 6        | <chem>NC(C=C1)=CC=C1S[C@H]2[C@H](OC(C)=O)[C@@H](OC(C)=O)[C@@H](OC(C)=O)[C@@H](OC(C)=O)O2</chem>                                                 | n.a.                                 | n.a.                                                 | n.a.                                                 |
| 7        | <chem>O=C(CN=[N+]=[N-])NC(C=C1)=CC=C1S[C@H]2[C@H](OC(C)=O)[C@@H](OC(C)=O)[C@@H](OC(C)=O)[C@@H](OC(C)=O)[C@@H](COC(C)=O)O2</chem>                | n.a.                                 | n.a.                                                 | n.a.                                                 |
| 8        | <chem>O=C(CCN=[N+]=[N-])NC(C=C1)=CC=C1S[C@H]2[C@H](OC(C)=O)[C@@H](OC(C)=O)[C@@H](OC(C)=O)[C@@H](OC(C)=O)[C@@H](COC(C)=O)O2</chem>               | n.a.                                 | n.a.                                                 | n.a.                                                 |
| 9        | <chem>O=C(CCCN=[N+]=[N-])NC(C=C1)=CC=C1S[C@H]2[C@H](OC(C)=O)[C@@H](OC(C)=O)[C@@H](OC(C)=O)[C@@H](OC(C)=O)[C@@H](COC(C)=O)O2</chem>              | n.a.                                 | n.a.                                                 | n.a.                                                 |
| 10       | <chem>O=C(CCCCN=[N+]=[N-])NC(C=C1)=CC=C1S[C@H]2[C@H](OC(C)=O)[C@@H](OC(C)=O)[C@@H](OC(C)=O)[C@@H](OC(C)=O)[C@@H](COC(C)=O)O2</chem>             | n.a.                                 | n.a.                                                 | n.a.                                                 |
| 16       | <chem>BrCCC1=CC=C(S(=O)(Cl)=O)S1</chem>                                                                                                         | n.a.                                 | n.a.                                                 | n.a.                                                 |

Table S3: key compounds and intermediates as smiles (n.a. = not applicable).

Figure S3: Purity of key compounds by HPLC-UV.

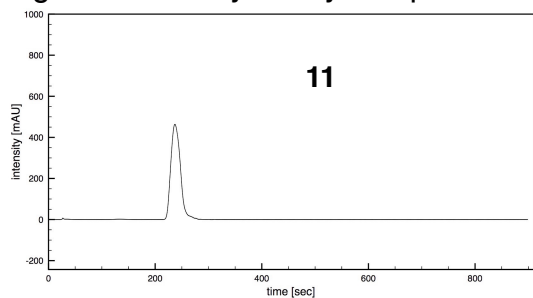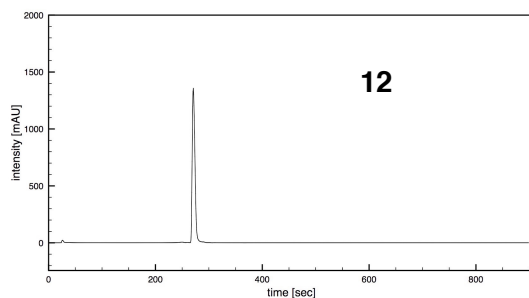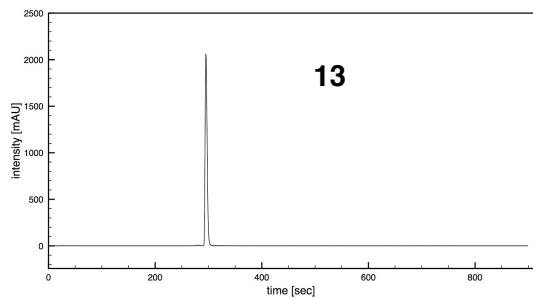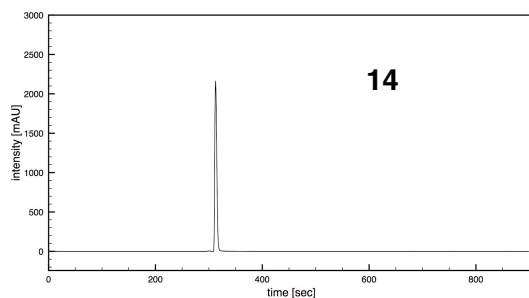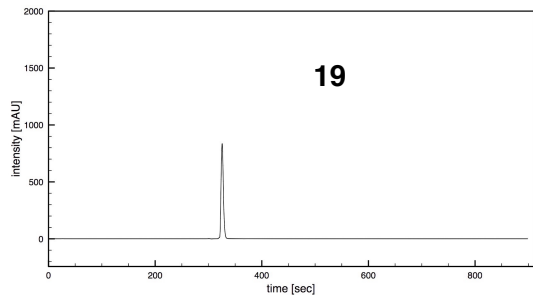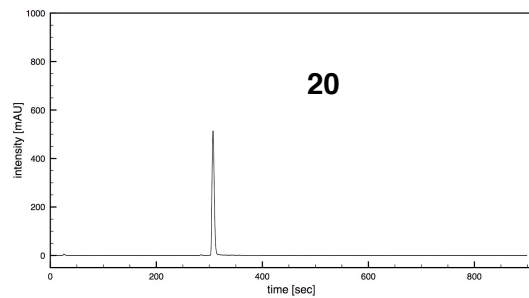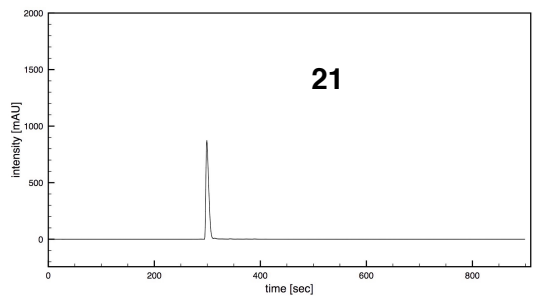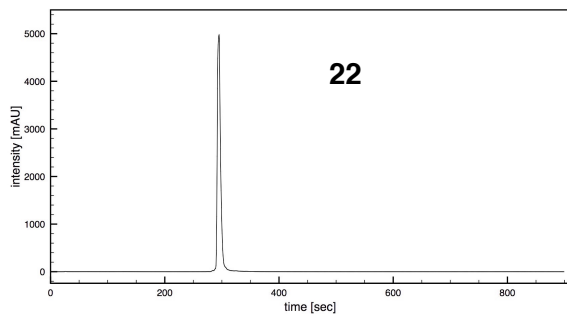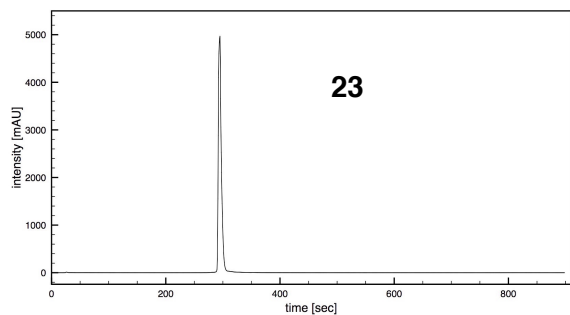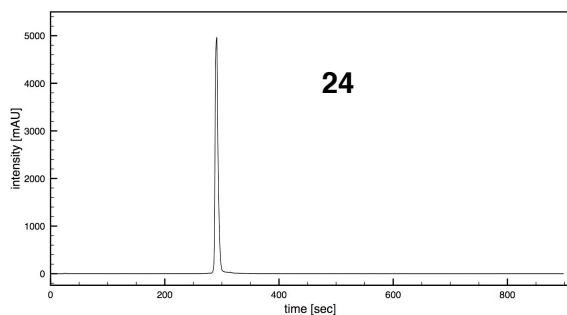

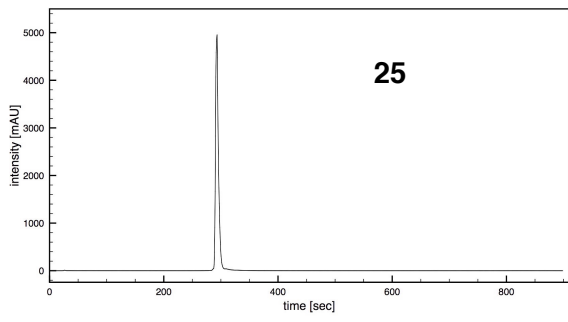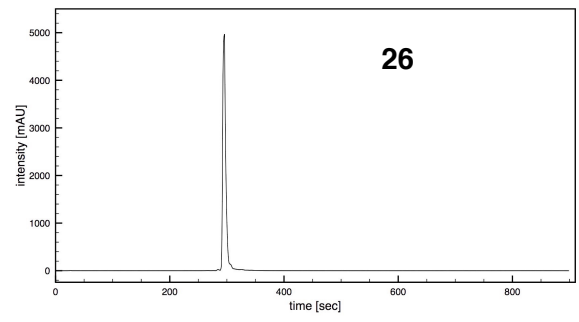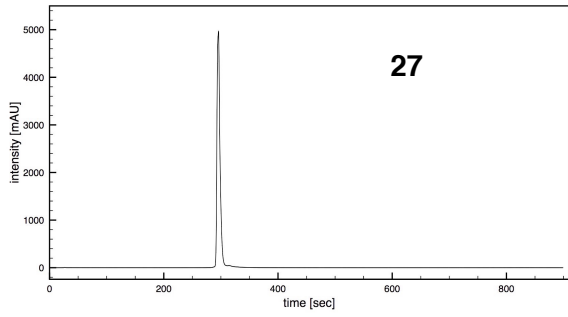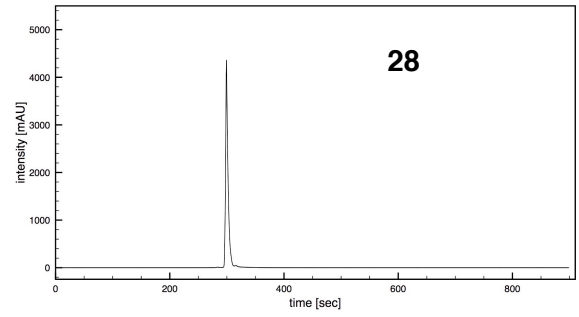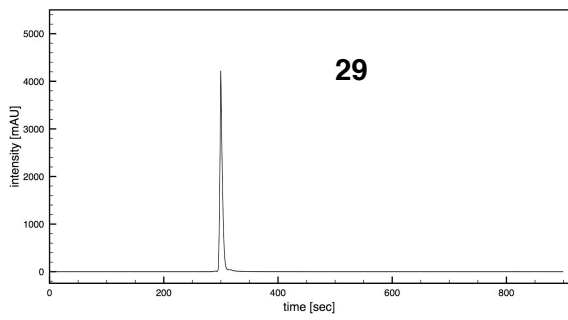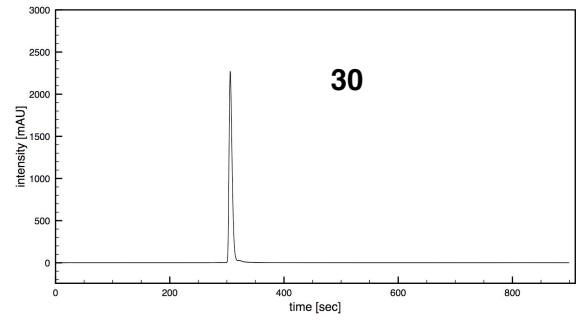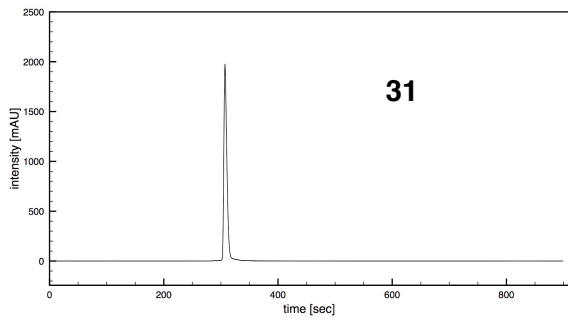

Table S4: Retention times measured by reversed-phase HPLC with a H<sub>2</sub>O/MeCN system, using three gradients a-c: a. 5-55% B over 20 min; b. 5-30% B over 20 min; c. 2-25% B over 20 min. Eluent A: H<sub>2</sub>O (0.1% formic acid), eluent B: MeCN (0.1% formic acid).

| compound | target | m | n | gradient                            |      |      |
|----------|--------|---|---|-------------------------------------|------|------|
|          |        |   |   | a                                   | b    | c    |
|          |        |   |   | retention time t <sub>R</sub> [min] |      |      |
| 22       | LecA   | 0 | 1 | 9.0                                 | 12.5 | 15.7 |
| 23       |        | 1 | 1 | 9.0                                 | 12.9 | 15.7 |
| 24       |        | 0 | 2 | 8.6                                 | 11.7 | 14.9 |
| 25       |        | 1 | 2 | 8.9                                 | 12.3 | 15.5 |
| 26       |        | 0 | 3 | 9.1                                 | 12.7 | 15.9 |
| 27       |        | 1 | 3 | 9.2                                 | 12.9 | 16.1 |
| 28       |        | 0 | 4 | 9.5                                 | 13.5 | 16.7 |
| 29       |        | 1 | 4 | 9.6                                 | 13.7 | 17.0 |
| 30       | LecB   | 0 | - | 10.0                                | 14.4 | 17.7 |
| 31       |        | 1 | - | 10.2                                | 14.7 | 18.0 |
| 3        |        | - | - | 7.0                                 | 8.5  | 11.6 |



Figure S4: representative chromatogram of conjugates **22 - 31** and ciprofloxacin (**3**) from slow gradient b (see table S4) HPLC runs for lipophilicity comparison. Top: full UV-chromatogram and gradient for eluent B, bottom: UV-chromatogram from t = 8.2 - 16.4 min.

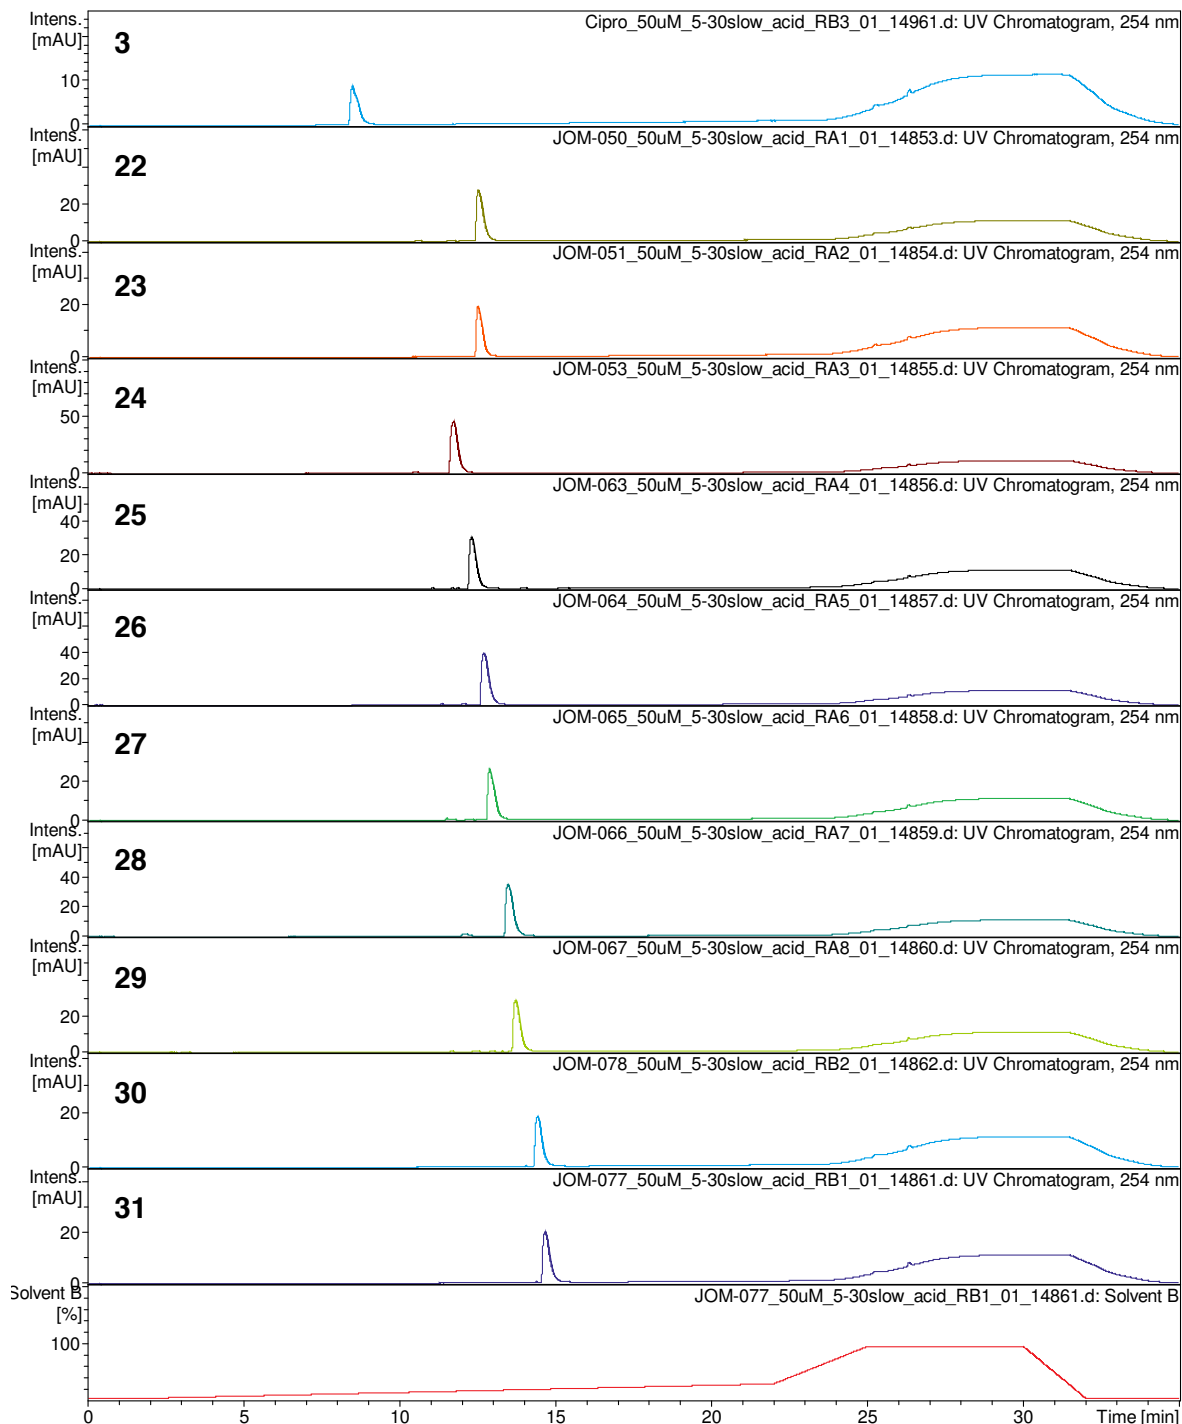

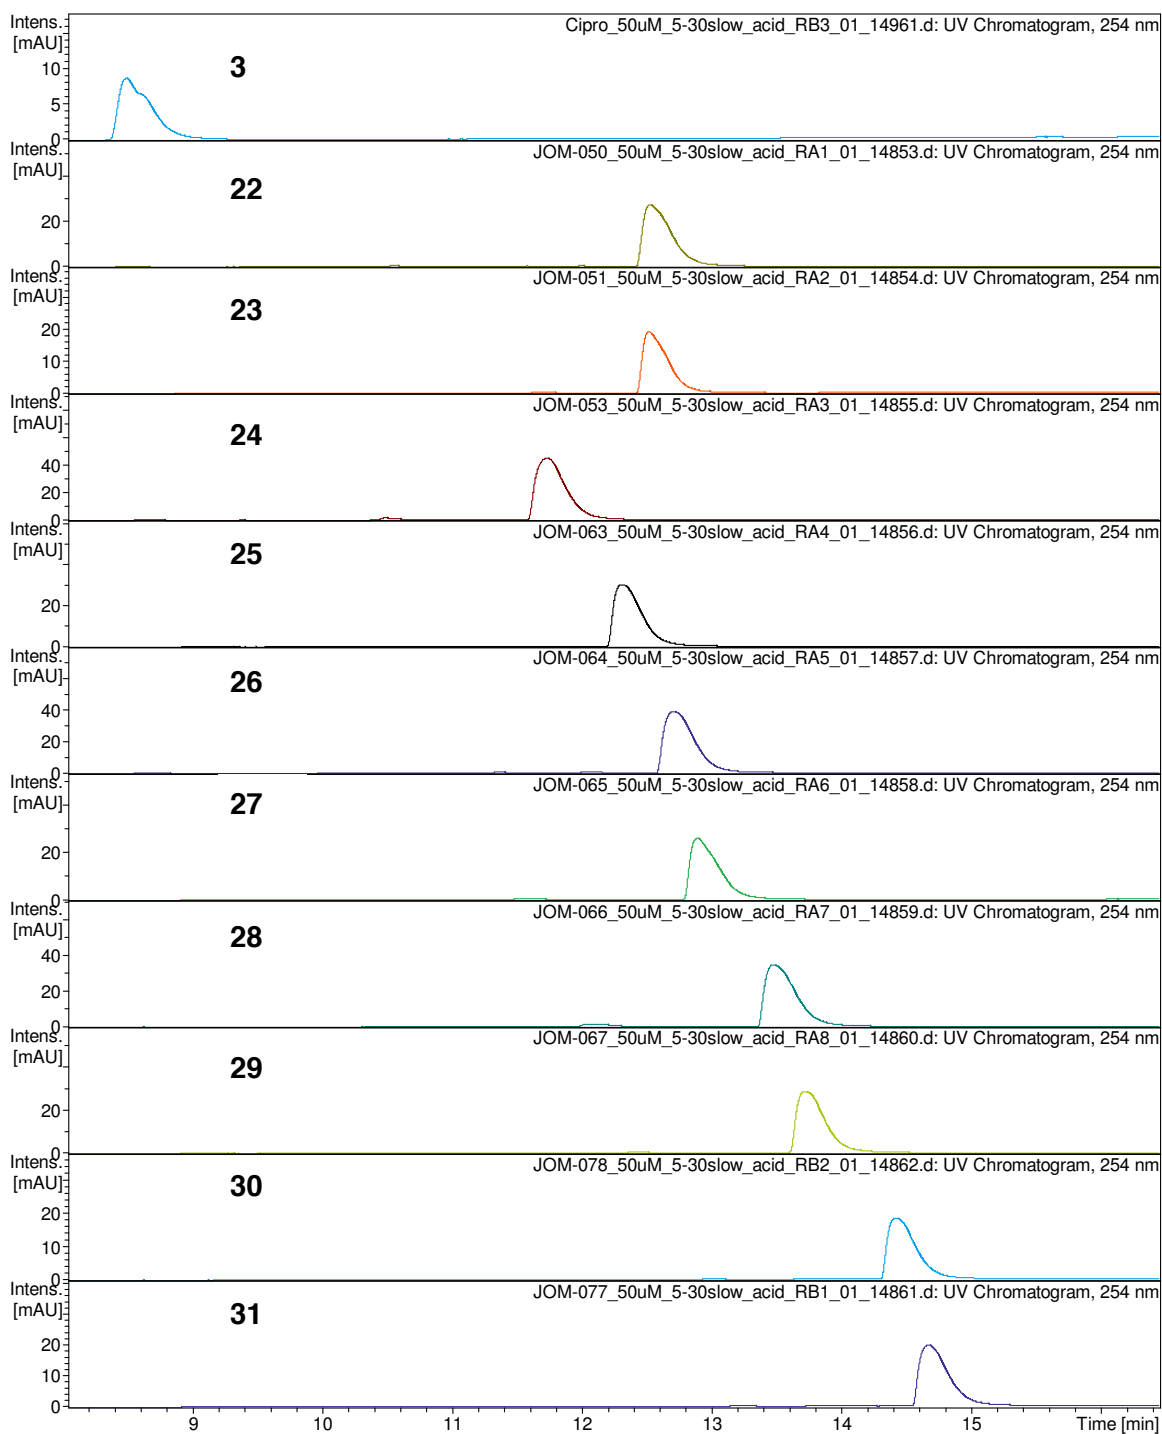

## References

1. Huang, X. Fluorescence polarization competition assay: the range of resolvable inhibitor potency is limited by the affinity of the fluorescent ligand. *J Biomol. Screen.* **2003**, *8*, 34-38.
2. Sommer, R.; Wagner, S.; Varrot, A.; Nycholat, C. M.; Khaledi, A.; Häussler, S.; Paulson, J. C.; Imberty, A.; Titz, A. The virulence factor LecB varies in clinical isolates: consequences for ligand binding and drug discovery. *Chem. Sci.* **2016**, *7*, 4990–5001.
